# Supplementary material for: Shedding light on predicting and controlling emission chromaticity in multicomponent photoluminescent systems
Source: PubMed Central journal article supplement — Chem Sci. 2021 Aug 11;12(36):12092–7. doi: 10.1039/d1sc03447b (PMC8457367; doi:10.1039/d1sc03447b), 2021-08-11
Supplement: SC-012-D1SC03447B-s001.pdf [file SC-012-D1SC03447B-s001.pdf]

## Shedding light on predicting and controlling emission chromaticity in multicomponent photoluminescent systems

Jayden Price, Dr. Barbora Balónová, Dr. Barry A. Blight, and Dr. Sara Eisler\*

### Supporting Information

#### Table of Contents:

|                                                                               |           |
|-------------------------------------------------------------------------------|-----------|
| Experimental methods                                                          | S2 – S3   |
| Average distance calculation                                                  | S4        |
| Characterization of individual PL emitters                                    | S5 – S9   |
| Two-component mixing experiments                                              | S10 – S23 |
| Synthesis of Nile Red & $^1\text{H}$ and $^{13}\text{C}$ NMR characterization | S24 – S26 |
| Three-component mixing to achieve WLE                                         | S27 – S29 |
| References                                                                    | S30       |

## **Experimental Section**

**Materials:** All commercially available reagents were used as received and without further purification. Perylene (analytical standard) (SKU: 45798-100MG), Coumarin 6 (C6) (98%) (SKU: 442631-1G), and *N,N'*-Bis(3-pentyl)perylene-3,4,9,10-bis(dicarboximide) (PDI) (98% HPLC grade) (SKU: 776289-1G) were purchased from Millipore Sigma. Rhodamine 6G (R6G) (SKU: CAAAJ62315-14, Lot No. X19B036) and Nile Blue A (SKU: A17174, Lot No. 10212146) were purchased from VWR/ Alfa Aesar. HPLC-grade chloroform (stabilized with 0.75 % ethanol) was purchased from Fisher Scientific.

**NMR spectra (<sup>1</sup>H and <sup>13</sup>C):** Spectra were recorded on a Varian Unity 400 MHz spectrometer (<sup>1</sup>H: 399.945 MHz, <sup>13</sup>C: 100.577 MHz). Samples were prepared in deuterated chloroform and spectra were referenced relative to the residual non-deuterated solvent peaks at 7.26 ppm (<sup>1</sup>H) and 77.16 ppm (<sup>13</sup>C).

**Fluorescence spectroscopy and mixing studies:** Emission and excitation spectra and mixing studies were recorded in HPLC-grade chloroform (10<sup>-6</sup> M) at room temperature using Edinburgh Instruments FS5 Fluorescence Spectrometer.

**Absolute photoluminescent (PL) quantum yields (ϕ):** Acquired via direct measurement at 298 K using an Edinburgh Instruments FS5 Spectrofluorimeter equipped with an SC-30 Integrating Sphere. Measurements were performed in a 1-cm quartz cuvette at room temperature. Excitation wavelengths ( $\lambda_{ex}$ ) for each emitter were chosen such that the entire emission spectrum could be collected. All spectra were recorded in HPLC-grade chloroform at a concentration of 10<sup>-5</sup> to 10<sup>-6</sup> M. Resulting data was processed using the Fluoracle® software package.

## Methods

### *General procedure for mixing experiments & prediction of expected CIE (x,y)*

Stock solutions of each PL component were prepared in chloroform at  $c = 1.2 \times 10^{-6}$  M. A total molecular concentration of  $c = 1.2 \times 10^{-6}$  M was maintained throughout the mixing experiments and mole fractions ( $\chi$ ) were reported.<sup>1</sup> First, the excitation spectrum for each PL component's stock solution was recorded using each component's respective emission maxima ( $\lambda_{max}^{em}$ ). Scan parameters including excitation/ emission bandwidths and number of scans were held constant to produce excitation spectra where the excitation intensities at common wavelengths ( $I_{ex,i}(\lambda_{ex})$ ) were comparable.

The emission spectra and CIE coordinates of the stock solutions of components 1 and 2 were acquired, which corresponded to  $\chi_1:\chi_2 = 1:0$  and  $0:1$ , respectively. The measured CIE values for component 1 ( $\chi_1:\chi_2 = 1:0$ ) and component 2 ( $\chi_1:\chi_2 = 0:1$ ) were used as provided from Fluoracle® (5 decimal points) when calculating the expected CIE coordinates (Eq. S1 and Eq. S2) of the subsequent mixtures. Using the stock solutions of component 1 and 2, mixtures with varied mole fractions ( $\chi_1:\chi_2 = 0.75:0.25, 0.50:0.50,$  and  $0.25:0.75$ ) were prepared and analyzed.

$$x_{mix} = \frac{\phi_1 \cdot \chi_1 \cdot I_{ex,1}}{\phi_1 \cdot \chi_1 \cdot I_{ex,1} + \phi_2 \cdot \chi_2 \cdot I_{ex,2}} x_1 + \frac{\phi_2 \cdot \chi_2 \cdot I_{ex,2}}{\phi_1 \cdot \chi_1 \cdot I_{ex,1} + \phi_2 \cdot \chi_2 \cdot I_{ex,2}} x_2 \quad (\text{Eq. S1})$$

$$y_{mix} = \frac{\phi_1 \cdot \chi_1 \cdot I_{ex,1}}{\phi_1 \cdot \chi_1 \cdot I_{ex,1} + \phi_2 \cdot \chi_2 \cdot I_{ex,2}} y_1 + \frac{\phi_2 \cdot \chi_2 \cdot I_{ex,2}}{\phi_1 \cdot \chi_1 \cdot I_{ex,1} + \phi_2 \cdot \chi_2 \cdot I_{ex,2}} y_2 \quad (\text{Eq. S2})$$

### Further Considerations

1. For accurate prediction, care was taken to ensure that the emitters' emission profiles were not sensitive to changes within the concentration range ( $0.3 - 1.2 \times 10^{-6}$  M) that was explored during the mixing experiments. For example, self-absorption is observed in the case of perylene between  $10^{-4} - 10^{-5}$  M, where within this concentration range, the intensity of the emission band centered around 443 nm dramatically changes.
2. A properly functioning monochromator is required for accurate results. Since excitation intensities at only one common wavelength are compared, an error in the expected emission ratio can occur if a large distribution of wavelengths is used to excite a mixture of emitters. To combat this, the excitation bandwidth was set between 1 – 2 nm (depending on the emission intensity) and held constant throughout a given mixing experiment.
3. For comparative excitation spectra, the power of the light source must be relatively constant for each set of measurements. Prior to acquiring the excitation spectra, the xenon lamp was given a 15-minute period to warm-up.

---

<sup>1</sup> Concentrations were controlled and mole fractions were reported for simplicity and with an aim of reducing the possibility of ET. However, since the excitation intensity of an emitter in solution is proportional to its concentration, only the relative proportions of each PL solution being mixed need to be known. Consequently, one could similarly use volume fraction if the excitation intensities of the PL solutions being mixed are used to predict the resulting emission chromaticity.

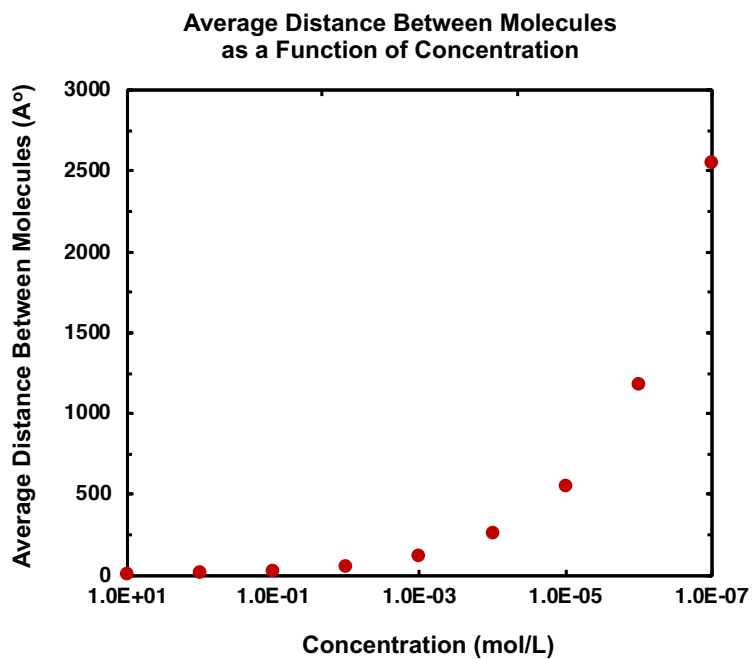

**Figure S1.** Average distance ( $\bar{A}^0$ ) between molecules as a function of concentration (mol/L)

$$\text{Average distance } (\bar{A}^0) \text{ between molecules} = \frac{1}{\sqrt[3]{\frac{c \cdot N_A}{1 \times 10^{27}}}}$$

where,  $N_A = 6.02214 \times 10^{23}$  and  $c = \text{concentration (mol/L)}$

## Photophysical Characterization

### Perylene

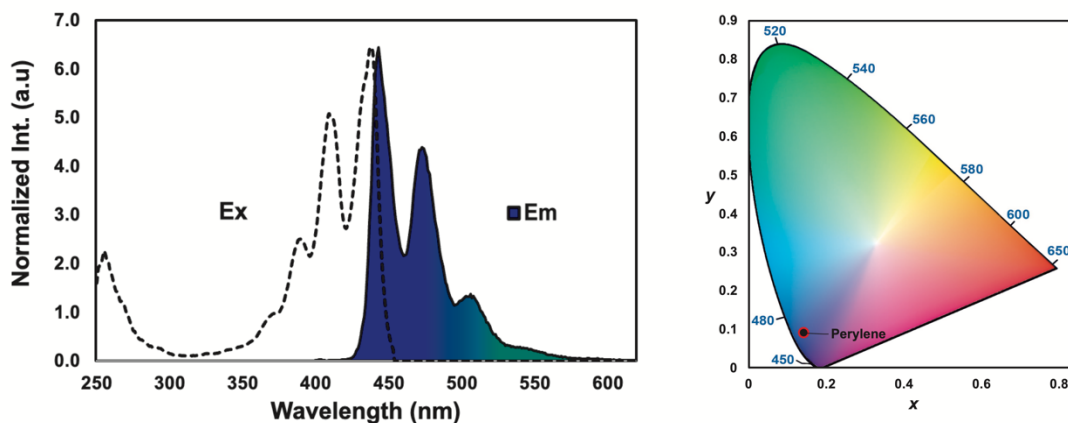

**Figure S2.** Perylene's excitation and emission profile in chloroform at  $10^{-6}$  M (left) and the corresponding CIE 1931 coordinates ( $\sim 0.14, 0.09$ ) obtained from perylene's emission profile using Fluoracle<sup>®</sup> (right).

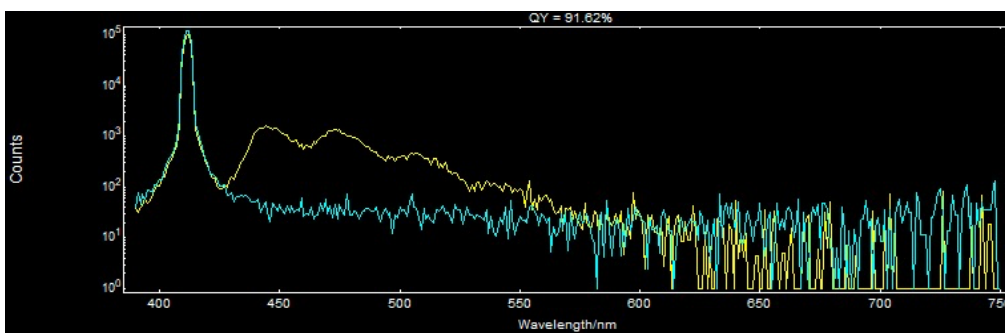

**Figure S3.** Perylene PLQY result (0.92) in chloroform at  $10^{-6}$  M ( $\lambda_{\text{ex}} = 410$  nm). An overlay showing the excitation scattering measured in chloroform (teal) + the excitation and emission scattering measured of perylene (yellow).

**N,N'-bis(3-pentyl)perylene-3,4,9,10-bis(dicarboximide) (PDI)**

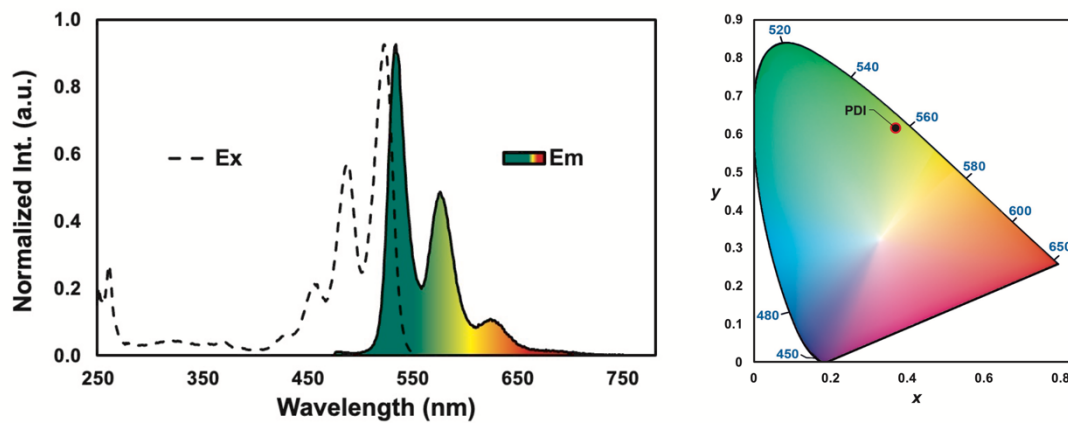

**Figure S4.** PDI's excitation and emission profile in chloroform at  $10^{-6}$  M (left) and the corresponding CIE 1931 coordinates ( $\sim 0.37, 0.61$ ) obtained from perylenes emission profile using Fluoracle® (right).

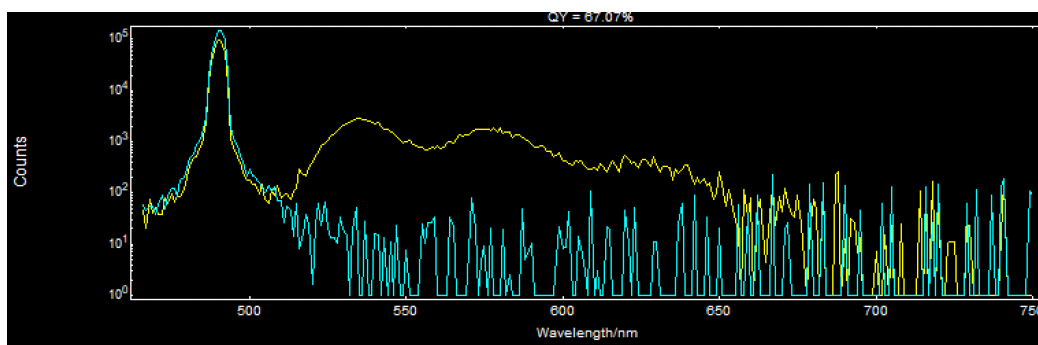

**Figure S5.** PDI absolute PLQY result (0.67) in chloroform at  $10^{-6}$  M ( $\lambda_{ex} = 488$  nm). An overlay showing the excitation scattering measured in chloroform (teal) + the excitation and emission scattering measured of PDI (yellow).

## Coumarin 6 (C6)

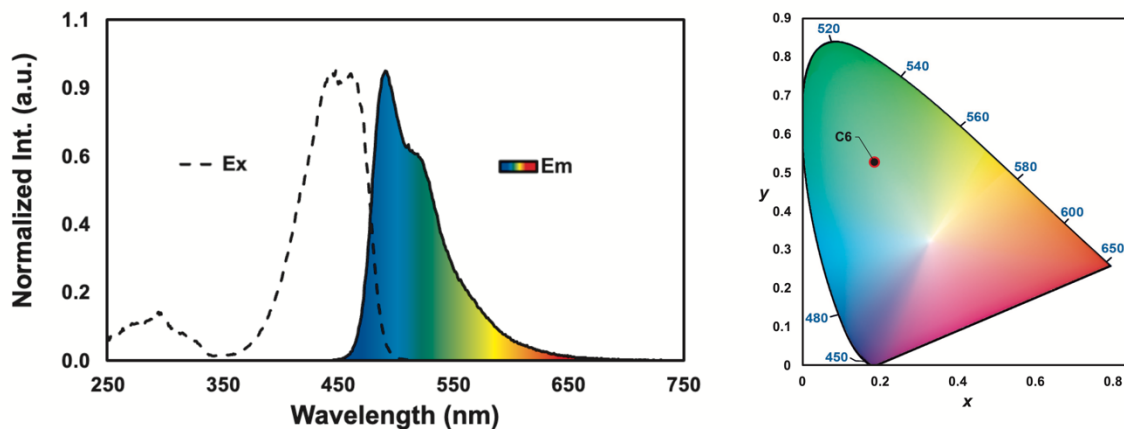

**Figure S6.** C6's excitation and emission profile in chloroform at  $10^{-6}$  M (left) and the corresponding CIE 1931 coordinates ( $\sim 0.19, 0.53$ ) obtained from perylenes emission profile using Fluoracle<sup>®</sup> (right).

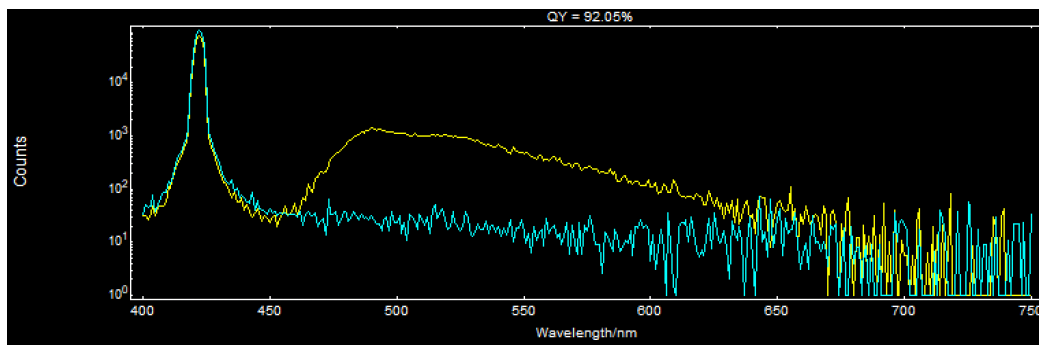

**Figure S7.** C6 PLQY result (0.92) in chloroform at  $10^{-6}$  M ( $\lambda_{ex} = 420$  nm). An overlay showing the excitation scattering measured in chloroform (teal) + the excitation and emission scattering measured of C6 (yellow).

## Rhodamine 6G (R6G)

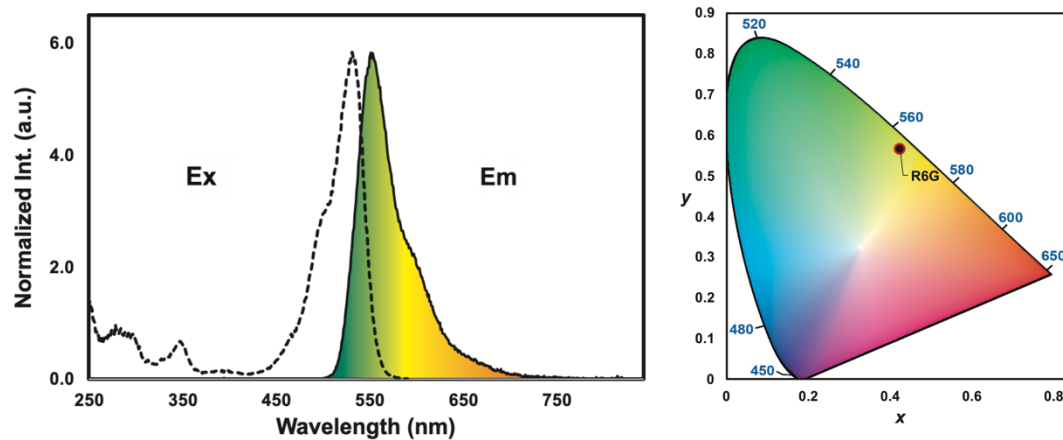

**Figure S8.** R6G's excitation and emission profile in chloroform at  $10^{-6}$  M (left) and the corresponding CIE 1931 coordinates ( $\sim 0.42, 0.57$ ) obtained from R6G's emission profile using Fluoracle® (right).

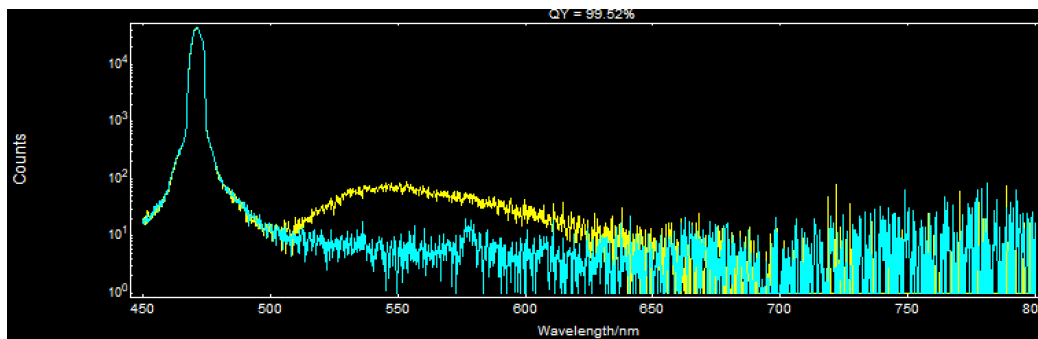

**Figure S9.** R6G PLQY result ( $\sim 1$ ) in chloroform at  $10^{-5}$  M ( $\lambda_{\text{ex}} = 470$  nm). An overlay showing the excitation scattering measured in chloroform (teal) + the excitation and emission scattering measured of R6G (yellow).



## Nile Red (NR)

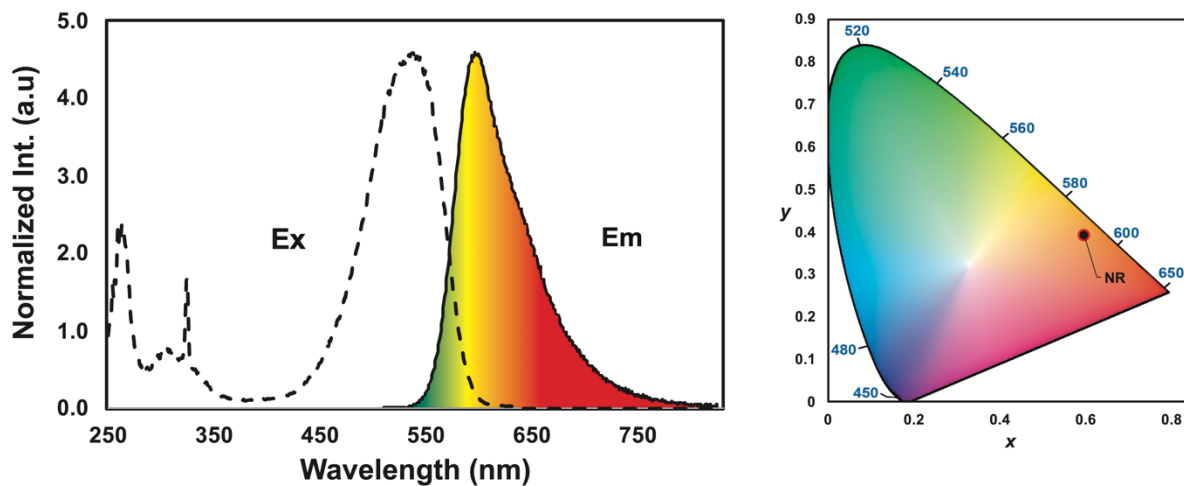

**Figure S10.** NR's excitation and emission profile in chloroform at  $10^{-6}$  M (left) and the corresponding CIE 1931 coordinates ( $\sim 0.60, 0.39$ ) obtained from NR's emission profile using Fluoracle<sup>®</sup> (right).

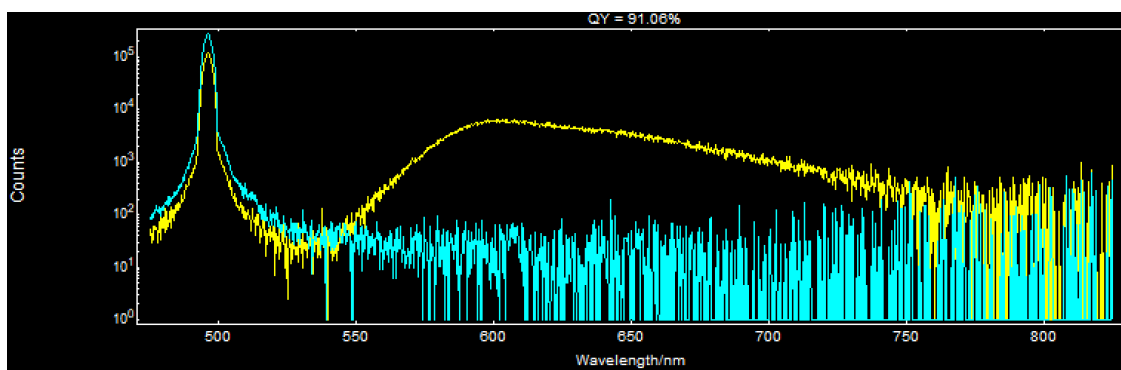

**Figure S11.** NR PLQY result (0.91) in chloroform at  $10^{-6}$  M ( $\lambda_{\text{ex}} = 495$  nm). An overlay showing the excitation scattering measured in chloroform (teal) + the excitation and emission scattering measured of NR (yellow).

## Perylene and C6 Mixing Experiment(s)

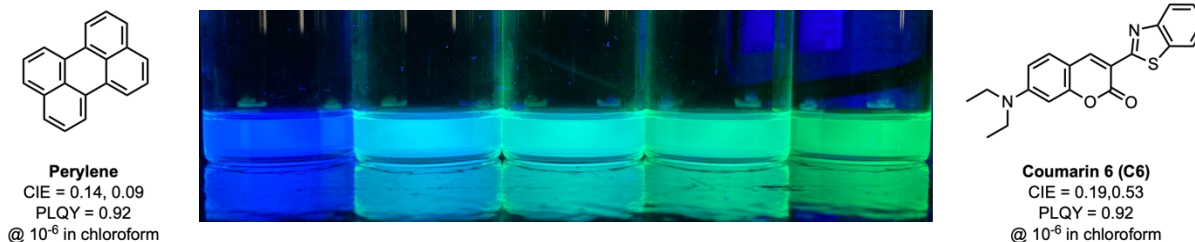

**Figure S12.** (From left to right) Perylene ( $1.2 \times 10^{-6}$  M), perylene: C6 ( $0.9 \times 10^{-6}$  M:  $0.3 \times 10^{-6}$  M), perylene: C6 ( $0.6 \times 10^{-6}$  M:  $0.6 \times 10^{-6}$  M), perylene: C6 ( $0.3 \times 10^{-6}$  M:  $0.9 \times 10^{-6}$  M), and C6 ( $1.2 \times 10^{-6}$  M) irradiated with a long wave UV-lamp at 365 nm.

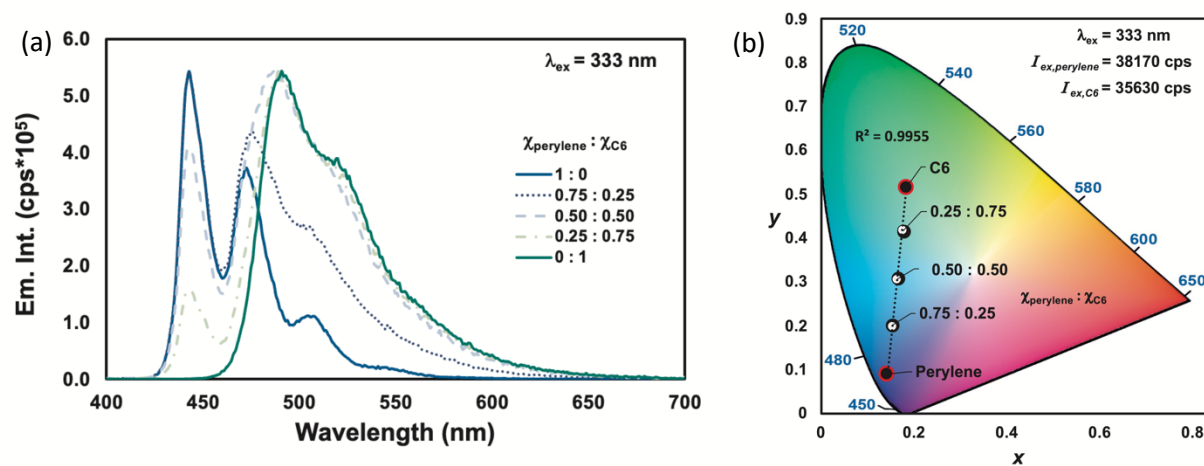

**Figure S13.** a) Perylene-C6 emission scans ( $\lambda_{ex}$  333 nm) with differing mole fractions ( $\chi_{\text{perylene}} : \chi_{\text{C6}}$ ) and (b) the corresponding CIE diagram showing the measured (●) and predicted (○) CIE coordinates.  $R^2$  value (0.9995) was obtained from measured data.

**Table S1.** Tabulated results obtained from Perylene-C6 PLCT mixing studies ( $\lambda_{ex}$  333 nm). <sup>a</sup>

| Mole Fractions ( $\chi$ )<br>Perylene to C6 | $\lambda_{ex} = 333$ nm          |                                    |                                |
|---------------------------------------------|----------------------------------|------------------------------------|--------------------------------|
|                                             | Measured<br>CIE (x,y)            | Expected <sup>b</sup><br>CIE (x,y) | Absolute <sup>c</sup><br>Error |
| 1 to 0                                      | 0.14330, 0.08953                 | -                                  | -                              |
| 0.75 to 0.25                                | 0.15, 0.20<br>(0.15444, 0.20076) | 0.15, 0.20                         | < 0.01<br>(0.004)              |
| 0.50 to 0.50                                | 0.17, 0.31<br>(0.16563, 0.30603) | 0.17, 0.30                         | < 0.01<br>(0.003)              |
| 0.25 to 0.75                                | 0.18, 0.41<br>(0.17719, 0.41441) | 0.18, 0.41                         | <0.01<br>(0.0001)              |
| 0 to 1                                      | 0.18413, 0.51508                 | -                                  | -                              |

<sup>a</sup> Reported solution data was measured in chloroform at a tot. molecular conc. of  $1.2 \times 10^{-6}$  M. Total molecular concentration was held constant while the mole fractions ( $\chi$ ) each component was varied. <sup>b</sup> Expected CIE (x,y) were calculated based on the measured properties of perylene ( $CIE_{perylene} = 0.14330, 0.08953$ ;  $I_{ex,perylene} = 38170$  cps at  $\lambda_{ex}$  333 nm;  $\phi_{perylene} = 0.92$ ; and  $\chi_i$  given in the table) and C6 ( $CIE_{C6} = 0.18413, 0.51508$ ;  $I_{ex,C6} = 35630$  cps at  $\lambda_{ex}$  333 nm;  $\phi_{C6} = 0.92$ ; and  $\chi_i$  given in the table) using Eq. 1. <sup>c</sup> Absolute error was calculated based on the distance ( $d$ ) between expected and measured CIE coordinates using  $d = \sqrt{(x_2 - x_1)^2 + (y_2 - y_1)^2}$ .

**Expected CIE (x,y) sample calculation for  $\chi_{perylene}$ :  $\chi_{C6} = 0.5:0.5$  @  $\lambda_{ex} = 333$  nm using Eq. S1 and Eq. S2:**

$$x_{mix} = \frac{0.92 \cdot 0.5 \cdot 38170}{0.92 \cdot 0.5 \cdot 38170 + 0.92 \cdot 0.5 \cdot 35630} \cdot 0.14330 + \frac{0.92 \cdot 0.5 \cdot 35630}{0.92 \cdot 0.5 \cdot 38170 + 0.92 \cdot 0.5 \cdot 35630} \cdot 0.18413 = 0.17$$

$$y_{mix} = \frac{0.92 \cdot 0.5 \cdot 38170}{0.92 \cdot 0.5 \cdot 38170 + 0.92 \cdot 0.5 \cdot 35630} \cdot 0.08953 + \frac{0.92 \cdot 0.5 \cdot 35630}{0.92 \cdot 0.5 \cdot 38170 + 0.92 \cdot 0.5 \cdot 35630} \cdot 0.51508 = 0.30$$

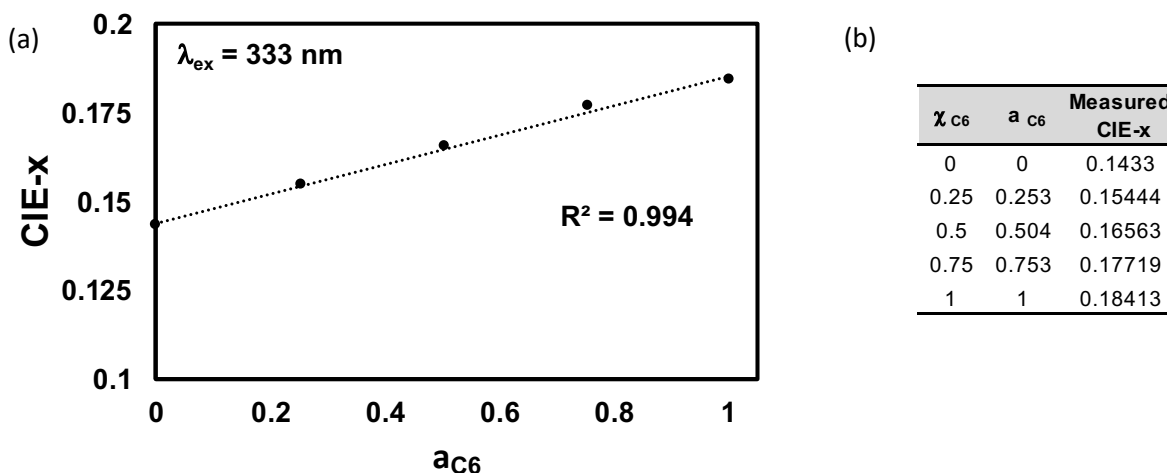

**Figure S14.** a) Scatter plot showing the linear dependence ( $R^2 = 0.9940$ ) of the measured CIE-x on the relative brightness of C6 ( $a_{C6} = \frac{\phi_{C6} \cdot I_{ex,C6} \cdot \chi_{C6}}{\sum \phi_i \cdot I_{ex,i} \cdot \chi_i}$ ) when excited at 333 nm and b) the corresponding tabulated data.

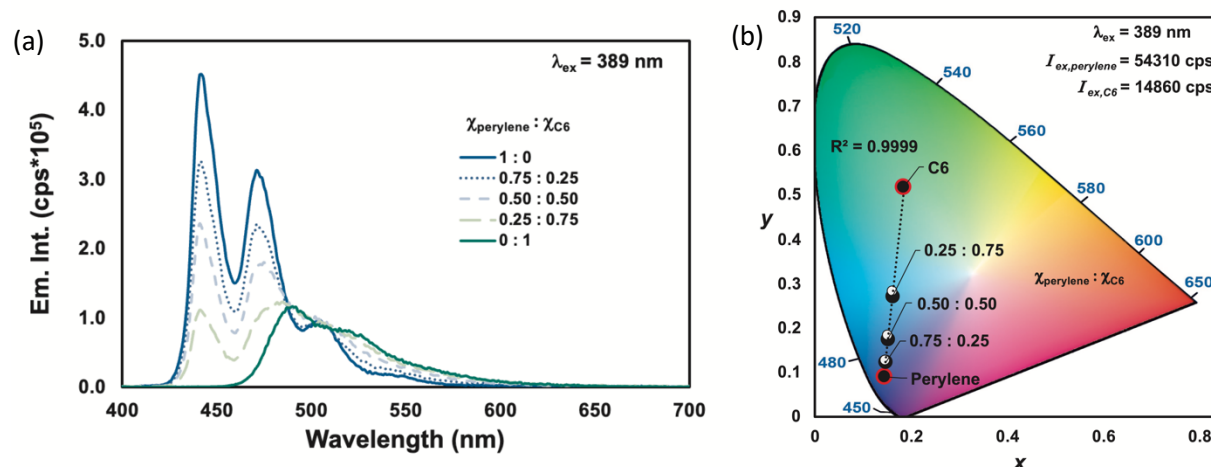

**Figure S15.** a) Perylene-C6 emission scans ( $\lambda_{ex}$  389nm) with differing mole fractions ( $\chi_{perylene}$ :  $\chi_{C6}$ ) and (b) the corresponding CIE diagram showing the measured (●) and predicted (○) CIE coordinates.  $R^2$  value (0.9999) was obtained from measured data.

**Table S2.** Tabulated results obtained from Perylene-C6 PLCT mixing studies ( $\lambda_{ex}$  389 nm). <sup>a</sup>

| Mole Fractions ( $\chi$ )<br>Perylene to C6 | $\lambda_{ex} = 389$ nm          |                                    |                                |
|---------------------------------------------|----------------------------------|------------------------------------|--------------------------------|
|                                             | Measured<br>CIE (x,y)            | Expected <sup>b</sup><br>CIE (x,y) | Absolute <sup>c</sup><br>Error |
| 1 to 0                                      | 0.14330, 0.08953                 | -                                  | -                              |
| 0.75 to 0.25                                | 0.15, 0.12<br>(0.14622, 0.12270) | 0.15, 0.13                         | < 0.01<br>(0.002)              |
| 0.50 to 0.50                                | 0.15, 0.18<br>(0.15155, 0.17521) | 0.15, 0.18                         | < 0.01<br>(0.006)              |
| 0.25 to 0.75                                | 0.16, 0.27<br>(0.16102, 0.27159) | 0.16, 0.28                         | 0.01<br>(0.0010)               |
| 0 to 1                                      | 0.18413, 0.51508                 | -                                  | -                              |

<sup>a</sup> Reported solution data was measured in chloroform at a tot. molecular conc. of  $1.2 \times 10^{-6}$  M. Total molecular concentration was held constant while the mole fractions ( $\chi$ ) each component was varied. <sup>b</sup> Expected CIE (x,y) were calculated based on the measured properties of perylene ( $CIE_{perylene} = 0.14330, 0.08953$ ;  $I_{ex,perylene} = 54310$  cps at  $\lambda_{ex}$  389 nm;  $\phi_{perylene} = 0.92$ ; and  $\chi_i$  given in the table) and C6 ( $CIE_{C6} = 0.18413, 0.51508$ ;  $I_{ex,C6} = 14860$  cps at  $\lambda_{ex}$  389 nm;  $\phi_{C6} = 0.92$ ; and  $\chi_i$  given in the table) using Eq. 1. <sup>c</sup> Absolute error was calculated based on the distance ( $d$ ) between expected and measured CIE coordinates using  $d = \sqrt{(x_2 - x_1)^2 + (y_2 - y_1)^2}$ .

**Expected CIE (x,y) sample calculation for  $\chi_{perylene}$ :  $\chi_{C6} = 0.5:0.5$  @  $\lambda_{ex} = 389$  nm using Eq. S1 and Eq. S2:**

$$x_{mix} = \frac{0.92 \cdot 0.5 \cdot 54310}{0.92 \cdot 0.5 \cdot 54310 + 0.92 \cdot 0.5 \cdot 14680} \cdot 0.14330 + \frac{0.92 \cdot 0.5 \cdot 14680}{0.92 \cdot 0.5 \cdot 54310 + 0.92 \cdot 0.5 \cdot 14680} \cdot 0.18413 = 0.15$$

$$y_{mix} = \frac{0.92 \cdot 0.5 \cdot 54310}{0.92 \cdot 0.5 \cdot 54310 + 0.92 \cdot 0.5 \cdot 14680} \cdot 0.08953 + \frac{0.92 \cdot 0.5 \cdot 14680}{0.92 \cdot 0.5 \cdot 54310 + 0.92 \cdot 0.5 \cdot 14680} \cdot 0.51508 = 0.18$$

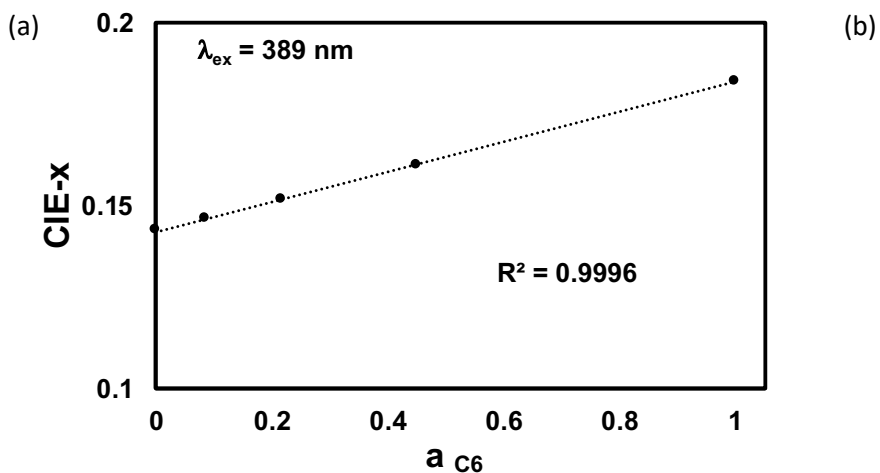

**Figure S16.** a) Scatter plot showing the linear dependence ( $R^2 = 0.9996$ ) of the measured CIE-x on the *relative brightness* of C6 ( $a_{C6} = \frac{\phi_{C6} \cdot I_{ex,C6} \cdot \chi_{C6}}{\sum \phi_i \cdot I_{ex,i} \cdot \chi_i}$ ) when excited at 389 nm and b) the corresponding tabulated data.

## Perylene and PDI Mixing Experiment

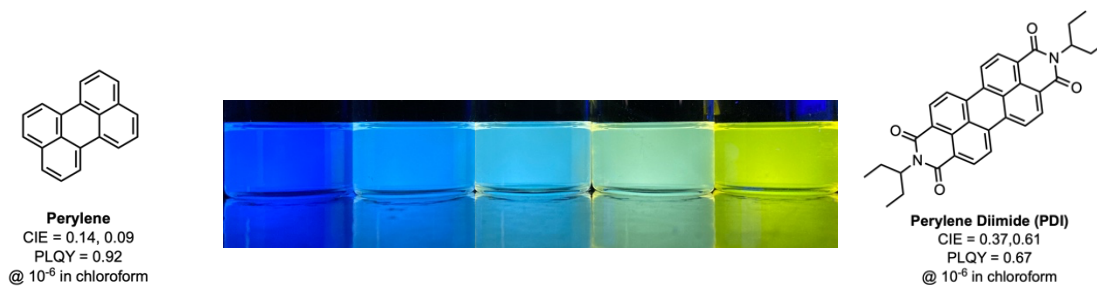

**Figure S17.** (From left to right) Perylene ( $1.2 \times 10^{-6}$  M), perylene: PDI ( $0.9 \times 10^{-6}$  M:  $0.3 \times 10^{-6}$  M; 0.75:0.25), perylene: PDI ( $0.6 \times 10^{-6}$  M:  $0.6 \times 10^{-6}$  M; 0.50:0.50), perylene: PDI ( $0.3 \times 10^{-6}$  M:  $0.9 \times 10^{-6}$  M; 0.25, 0.75), and PDI ( $1.2 \times 10^{-6}$  M) irradiated with a long wave UV-lamp at 365 nm.

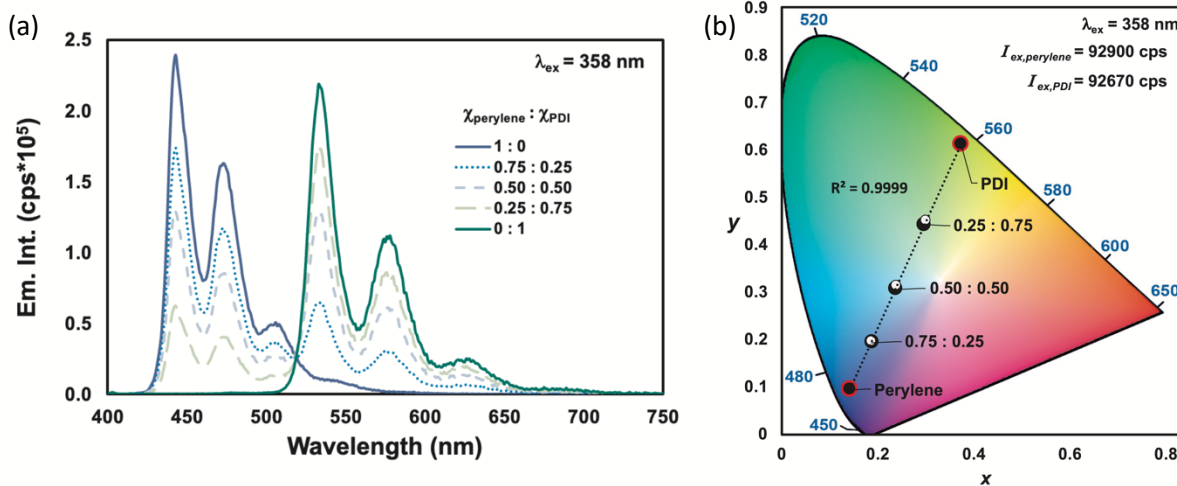

**Figure S18.** a) Perylene-PDI emission scans ( $\lambda_{ex}$  358 nm) with differing mole fractions ( $\chi_{\text{perylene}} : \chi_{\text{PDI}}$ ) and (b) the corresponding CIE diagram showing the measured (●) and predicted (○) CIE coordinates.  $R^2$  value (0.9999) was obtained from measured data.

**Table S3.** Tabulated results obtained from Perylene-PDI PLCT mixing studies ( $\lambda_{ex}$  358 nm). <sup>a</sup>

| Mole Fractions ( $\chi$ )<br>Perylene to PDI | $\lambda_{ex} = 358$ nm          |                                    |                                |
|----------------------------------------------|----------------------------------|------------------------------------|--------------------------------|
|                                              | Measured<br>CIE (x,y)            | Expected <sup>b</sup><br>CIE (x,y) | Absolute <sup>c</sup><br>Error |
| 1 to 0                                       | 0.14304, 0.09429                 | -                                  | -                              |
| 0.75 to 0.25                                 | 0.19, 0.19<br>(0.18733, 0.19493) | 0.19, 0.19                         | < 0.01<br>(0.0007)             |
| 0.50 to 0.50                                 | 0.24, 0.31<br>(0.23703, 0.30730) | 0.24, 0.31                         | < 0.01 (0.005)                 |
| 0.25 to 0.75                                 | 0.30, 0.44<br>(0.29707, 0.44223) | 0.30, 0.45                         | < 0.01 (0.007)                 |
| 0 to 1                                       | 0.37369, 0.61057                 | -                                  | -                              |

<sup>a</sup> Reported solution data was measured in chloroform at a tot. molecular conc. of  $1.2 \times 10^{-6}$  M. Total molecular concentration was held constant while the mole fractions ( $\chi$ ) each component was varied. <sup>b</sup> Expected CIE (x,y) were calculated based on the measured properties of perylene ( $CIE_{perylene} = 0.14304, 0.09429$ ;  $I_{ex,perylene} = 92900$  cps at  $\lambda_{ex}$  358 nm;  $\phi_{perylene} = 0.92$ ; and  $\chi_i$  given in the table) and PDI ( $CIE_{PDI} = 0.37369, 0.61057$ ;  $I_{ex,PDI} = 92670$  cps at  $\lambda_{ex}$  358 nm;  $\phi_{PDI} = 0.67$ ; and  $\chi_i$  given in the table) using Eq. 1. <sup>c</sup> Absolute error was calculated based on the distance ( $d$ ) between expected and measured CIE coordinates using  $d = \sqrt{(x_2 - x_1)^2 + (y_2 - y_1)^2}$ .

**Expected CIE (x,y) sample calculation for  $\chi_{perylene} : \chi_{PDI} = 0.5 : 0.5$  @  $\lambda_{ex} = 358$  nm using Eq. S1 and Eq. S2:**

$$x_{mix} = \frac{0.92 \cdot 0.5 \cdot 92900}{0.92 \cdot 0.5 \cdot 92900 + 0.67 \cdot 0.5 \cdot 92670} \cdot 0.14304 + \frac{0.67 \cdot 0.5 \cdot 92670}{0.92 \cdot 0.5 \cdot 92900 + 0.67 \cdot 0.5 \cdot 14680} \cdot 0.37369 = 0.24$$

$$y_{mix} = \frac{0.92 \cdot 0.5 \cdot 92900}{0.92 \cdot 0.5 \cdot 92900 + 0.67 \cdot 0.5 \cdot 92670} \cdot 0.09429 + \frac{0.67 \cdot 0.5 \cdot 92670}{0.92 \cdot 0.5 \cdot 92900 + 0.67 \cdot 0.5 \cdot 92670} \cdot 0.61057 = 0.31$$

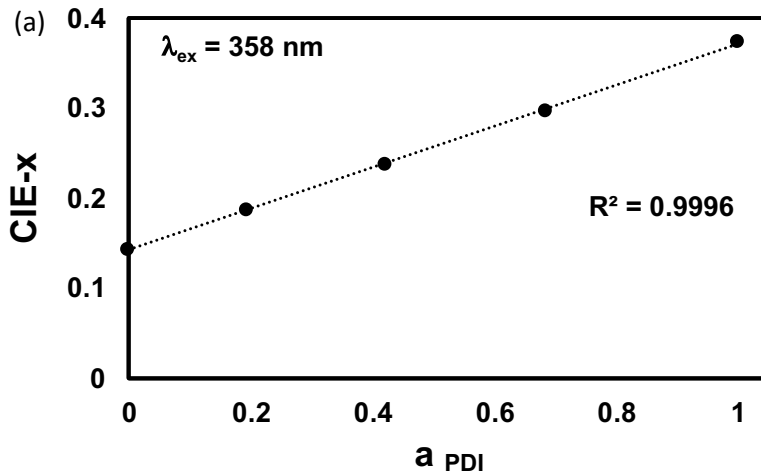

(b)

| $\chi_{PDI}$ | $a_{PDI}$ | Measured<br>CIE-x |
|--------------|-----------|-------------------|
| 0            | 0         | 0.14304           |
| 0.25         | 0.195     | 0.18733           |
| 0.5          | 0.421     | 0.23703           |
| 0.75         | 0.685     | 0.29707           |
| 1            | 1         | 0.37369           |

**Figure S19.** a) Scatter plot showing the linear dependence ( $R^2 = 0.9996$ ) of the measured CIE-x on the *relative brightness* of PDI ( $a_{PDI} = \frac{\phi_{PDI} \cdot I_{ex,PDI} \cdot \chi_{PDI}}{\sum \phi_i \cdot I_{ex,i} \cdot \chi_i}$ ) when excited at 358 nm and b) the corresponding tabulated data.

## C6 and PDI Mixing Experiment

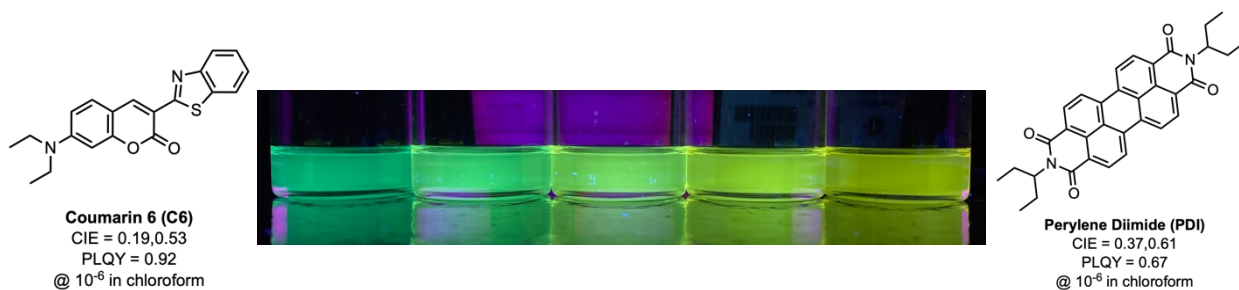

**Figure S20.** (From left to right) C6 ( $1.2 \times 10^{-6}$  M), C6: PDI ( $0.9 \times 10^{-6}$  M:  $0.3 \times 10^{-6}$  M), C6: PDI ( $0.6 \times 10^{-6}$  M:  $0.6 \times 10^{-6}$  M), C6: PDI ( $0.3 \times 10^{-6}$  M:  $0.9 \times 10^{-6}$  M), and PDI ( $1.2 \times 10^{-6}$  M) irradiated with a long wave UV-lamp at 365 nm.

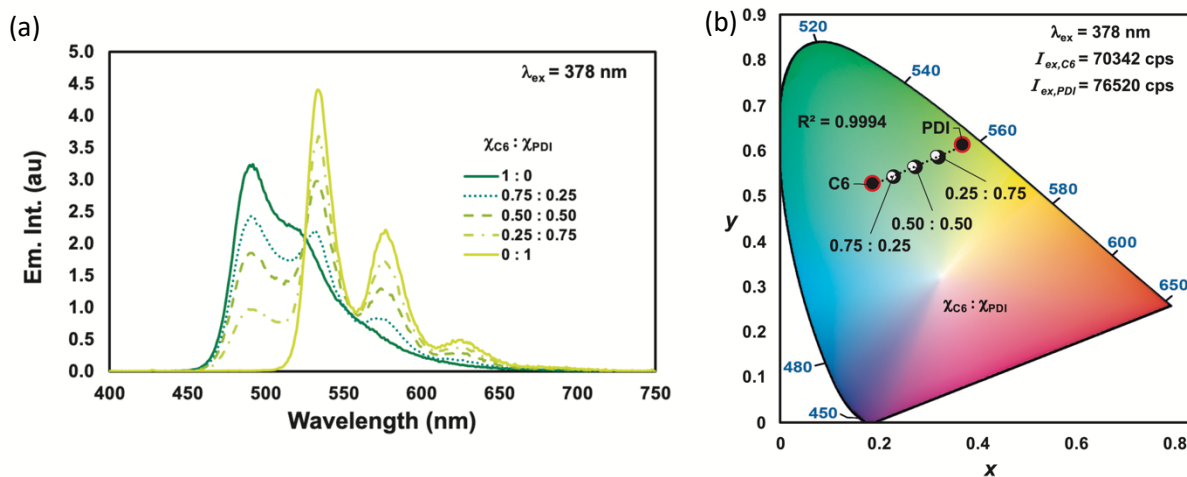

**Figure S21.** a) C6-PDI emission scans ( $\lambda_{ex}$  378 nm) with differing mole fractions ( $\chi_{C6}$ :  $\chi_{PDI}$ ) and (b) the corresponding CIE diagram showing the measured (●) and predicted (○) CIE coordinates.  $R^2$  value (0.9994) was obtained from measured data.



**Table S4.** Tabulated results obtained from C6-PDI PLCT mixing studies ( $\lambda_{ex}$  378 nm). <sup>a</sup>

| Mole Fractions ( $\chi$ )<br>C6 to PDI | $\lambda_{ex} = 378$ nm          |                                    |                                |
|----------------------------------------|----------------------------------|------------------------------------|--------------------------------|
|                                        | Measured<br>CIE (x,y)            | Expected <sup>b</sup><br>CIE (x,y) | Absolute <sup>c</sup><br>Error |
| 1 to 0                                 | 0.18737, 0.52564                 | -                                  | -                              |
| 0.75 to 0.25                           | 0.23, 0.54<br>(0.22880, 0.54495) | 0.22, 0.54                         | < 0.01 (0.003)                 |
| 0.50 to 0.50                           | 0.27, 0.56<br>(0.27291, 0.56474) | 0.26, 0.56                         | < 0.01 (0.005)                 |
| 0.25 to 0.75                           | 0.32, 0.59<br>(0.31983, 0.58756) | 0.31, 0.59                         | < 0.01 (0.004)                 |
| 0 to 1                                 | 0.37043, 0.61324                 | -                                  | -                              |

<sup>a</sup> Reported solution data was measured in chloroform at a tot. molecular conc. of  $1.2 \times 10^{-6}$  M. Total molecular concentration was held constant while the mole fractions ( $\chi$ ) each component was varied. <sup>b</sup> Expected CIE (x,y) were calculated based on the measured properties of C6 ( $CIE_{C6} = 0.18737, 0.52564$ ;  $I_{ex,C6} = 70342$  cps at  $\lambda_{ex}$  378 nm;  $\phi_{C6} = 0.92$ ; and  $\chi_i$  given in the table) and PDI ( $CIE_{PDI} = 0.37043, 0.61324$ ;  $I_{ex,PDI} = 76520$  cps at  $\lambda_{ex}$  358 nm;  $\phi_{PDI} = 0.67$ ; and  $\chi_i$  given in the table) using Eq. 1. <sup>c</sup> Absolute error was calculated based on the distance ( $d$ ) between expected and measured CIE coordinates using  $d = \sqrt{(x_2 - x_1)^2 + (y_2 - y_1)^2}$ .

**Predicted CIE (x,y) sample calculation for  $\chi_{C6} : \chi_{PDI} = 0.5:0.5$  @  $\lambda_{ex} = 378$  nm using Eq. S1 and Eq. S2:**

$$x_{mix} = \frac{0.92 \cdot 0.5 \cdot 70342}{0.92 \cdot 0.5 \cdot 70342 + 0.67 \cdot 0.5 \cdot 76520} \cdot 0.18737 + \frac{0.67 \cdot 0.5 \cdot 76520}{0.92 \cdot 0.5 \cdot 70342 + 0.67 \cdot 0.5 \cdot 76520} \cdot 0.37043 = 0.26$$

$$y_{mix} = \frac{0.92 \cdot 0.5 \cdot 70342}{0.92 \cdot 0.5 \cdot 70342 + 0.67 \cdot 0.5 \cdot 76520} \cdot 0.52564 + \frac{0.67 \cdot 0.5 \cdot 76520}{0.92 \cdot 0.5 \cdot 70342 + 0.67 \cdot 0.5 \cdot 76520} \cdot 0.51324 = 0.56$$

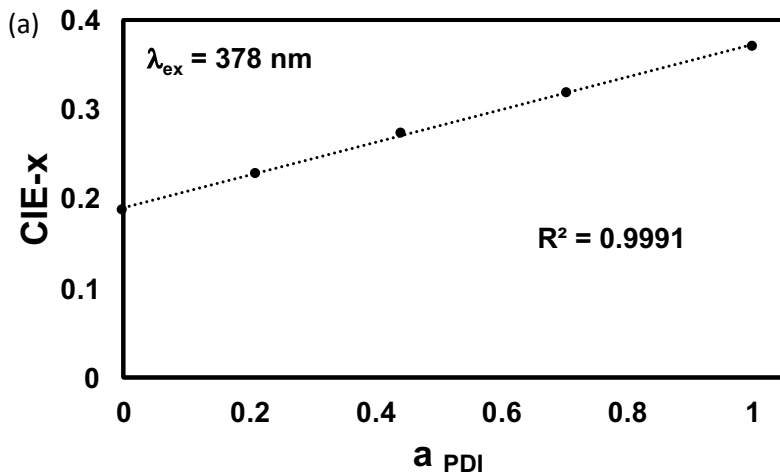

(b)

| $\chi_{PDI}$ | $a_{PDI}$ | Measured<br>CIE-x |
|--------------|-----------|-------------------|
| 0            | 0         | 0.18737           |
| 0.25         | 0.209     | 0.2288            |
| 0.5          | 0.442     | 0.27291           |
| 0.75         | 0.704     | 0.31983           |
| 1            | 1         | 0.37043           |

**Figure S22.** Scatter plot showing the linear dependence ( $R^2 = 0.9991$ ) of the measured CIE-x on the *relative brightness* of PDI ( $a_{PDI} = \frac{\phi_{PDI} \cdot I_{ex,PDI} \cdot \chi_{PDI}}{\sum \phi_i \cdot I_{ex,i} \cdot \chi_i}$ ) when excited at 378 nm and b) the corresponding tabulated data.

## Perylene and Rhodamine 6G (R6G) Mixing Experiments

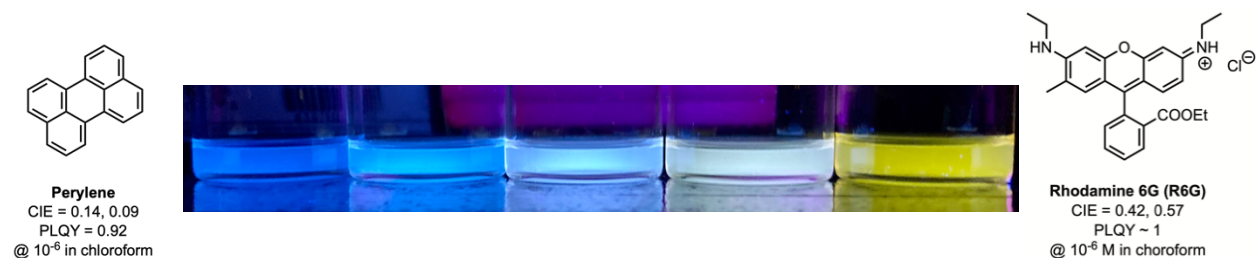

**Figure S23.** (From left to right) Perylene ( $1.2 \times 10^{-6}$  M), Perylene: R6G ( $0.9 \times 10^{-6}$  M:  $0.3 \times 10^{-6}$  M), Perylene: R6G ( $0.6 \times 10^{-6}$  M:  $0.6 \times 10^{-6}$  M), Perylene: R6G ( $0.3 \times 10^{-6}$  M:  $0.9 \times 10^{-6}$  M), and R6G ( $1.2 \times 10^{-6}$  M) irradiated with a long wave UV-lamp at 365 nm.

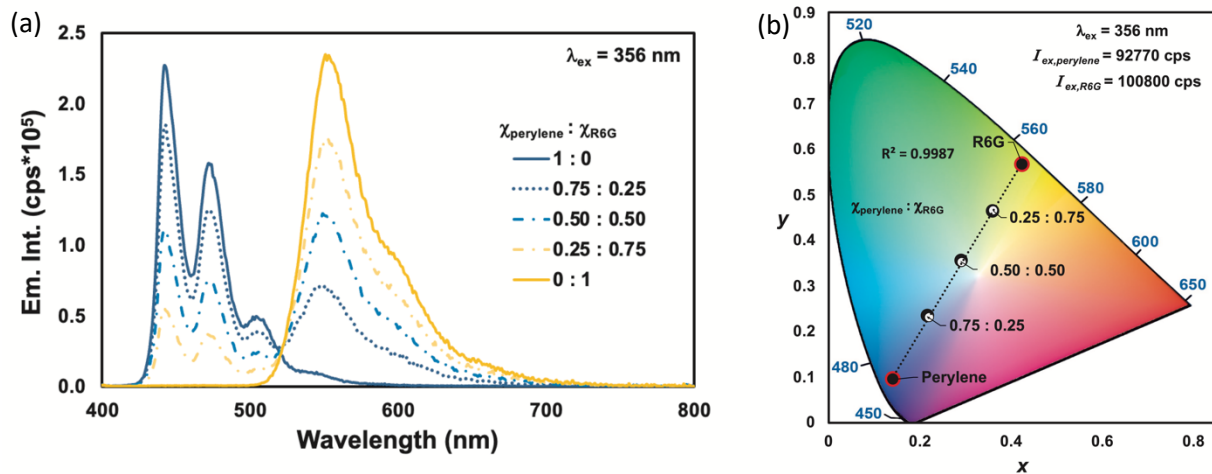

**Figure S24.** a) Perylene-R6G emission scans ( $\lambda_{ex}$  356 nm) with differing mole fractions ( $\chi_{\text{perylene}} : \chi_{\text{R6G}}$ ) and (b) the corresponding CIE diagram showing the measured (●) and predicted (○) CIE coordinates.  $R^2$  value (0.9987) was obtained from measured data.

**Table S5.** Tabulated results obtained from Perylene-R6G PLCT mixing studies ( $\lambda_{ex}$  356 nm).<sup>a</sup>

| Mole Fractions ( $\chi$ )<br>Perylene to R6G | $\lambda_{ex} = 356$ nm          |                                    |                                |
|----------------------------------------------|----------------------------------|------------------------------------|--------------------------------|
|                                              | Measured<br>CIE (x,y)            | Expected <sup>b</sup><br>CIE (x,y) | Absolute <sup>c</sup><br>Error |
| 1 to 0                                       | 0.14303, 0.09447                 | -                                  | -                              |
| 0.75 to 0.25                                 | 0.22, 0.23<br>(0.21705, 0.23256) | 0.22, 0.23                         | < 0.01<br>(0.007)              |
| 0.50 to 0.50                                 | 0.29, 0.35<br>(0.29076, 0.35416) | 0.30, 0.35                         | < 0.01<br>(0.007)              |
| 0.25 to 0.75                                 | 0.36, 0.46<br>(0.36036, 0.46472) | 0.36, 0.46                         | <0.01<br>(0.0004)              |
| 0 to 1                                       | 0.42455,0.56565                  | -                                  | -                              |

<sup>a</sup> Reported solution data was measured in chloroform at a tot. molecular conc. of  $1.2 \times 10^{-6}$  M. Total molecular concentration was held constant while the mole fractions ( $\chi$ ) each component was varied. <sup>b</sup> Expected CIE (x,y) were calculated based on the measured properties of perylene ( $CIE_{perylene} = 0.14303, 0.09447$ ;  $I_{ex,perylene} = 92770$  cps at  $\lambda_{ex}$  356 nm;  $\phi_{perylene} = 0.92$ ; and  $\chi_i$  given in the table) and R6G ( $CIE_{R6G} = 0.42455, 0.56565$ ;  $I_{ex,R6G} = 100800$  cps at  $\lambda_{ex}$  356 nm;  $\phi_{R6G} = 1$ ; and  $\chi_i$  given in the table) using Eq. 1. <sup>c</sup> Absolute error was calculated based on the distance ( $d$ ) between expected and measured CIE coordinates using  $d = \sqrt{(x_2 - x_1)^2 + (y_2 - y_1)^2}$ .

**Predicted CIE (x,y) sample calculation for  $\chi_{perylene} : \chi_{R6G} = 0.5:0.5$  @  $\lambda_{ex} = 356$  nm using Eq. S1 and Eq. S2:**

$$x_{mix} = \frac{0.92 \cdot 0.5 \cdot 92770}{0.92 \cdot 0.5 \cdot 92770 + 1 \cdot 0.5 \cdot 100800} \cdot 0.14303 + \frac{1 \cdot 0.5 \cdot 100800}{0.92 \cdot 0.5 \cdot 92770 + 1 \cdot 0.5 \cdot 100800} \cdot 0.42455 = 0.30$$

$$y_{mix} = \frac{0.92 \cdot 0.5 \cdot 92770}{0.92 \cdot 0.5 \cdot 92770 + 1 \cdot 0.5 \cdot 100800} \cdot 0.09447 + \frac{1 \cdot 0.5 \cdot 100800}{0.92 \cdot 0.5 \cdot 92770 + 1 \cdot 0.5 \cdot 100800} \cdot 0.56565 = 0.35$$

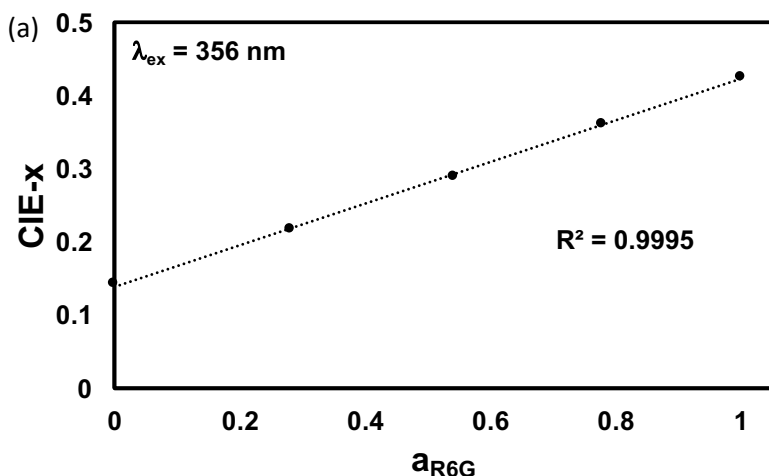

(b)

| $\chi_{R6G}$ | $a_{R6G}$ | Measured<br>CIE-x |
|--------------|-----------|-------------------|
| 0            | 0         | 0.14303           |
| 0.25         | 0.282     | 0.21705           |
| 0.5          | 0.542     | 0.29076           |
| 0.75         | 0.78      | 0.36036           |
| 1            | 1         | 0.42455           |

**Figure S25.** a) Scatter plot showing the linear dependence ( $R^2 = 0.9995$ ) of the measured CIE-x on the *relative brightness* of R6G ( $a_{R6G} = \frac{\phi_{R6G} \cdot I_{ex,R6G} \cdot \chi_{R6G}}{\sum \phi_i \cdot I_{ex,i} \cdot \chi_i}$ ) and b) the corresponding tabulated data.

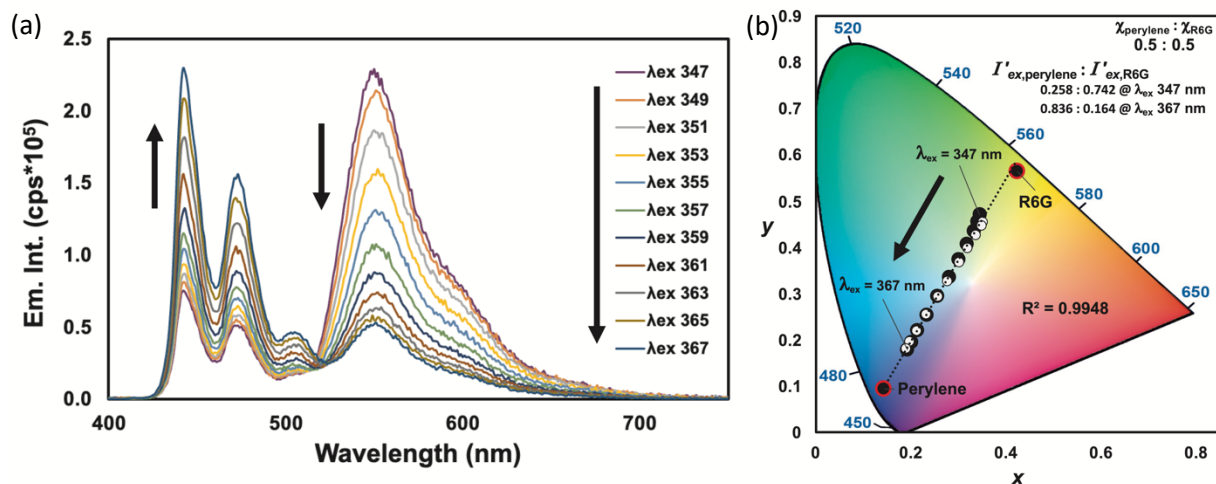

**Figure S26.** a) Perylene-R6G ( $\chi_{\text{perylene}} : \chi_{\text{R6G}} = 0.5 : 0.5$ ) emission spectra obtained using different excitation wavelengths ( $\lambda_{\text{ex}}$  347-367 nm; 2 nm intervals) and (b) the corresponding CIE diagram showing the measured (●) and predicted (○) CIE coordinates.  $R^2$  value (0.9948) was obtained from measured data. Relative excitation intensities of perylene ( $I'_{\text{ex,perylene}}$ ) and R6G ( $I'_{\text{ex,R6G}}$ ) were calculated using  $\frac{I_{\text{ex,perylene}}}{I_{\text{ex,perylene}} + I_{\text{ex,R6G}}}$  &  $\frac{I_{\text{ex,R6G}}}{I_{\text{ex,perylene}} + I_{\text{ex,R6G}}}$ , respectively, using the intensities shown in Table S6.

**Table S6.** Tabulated results obtained from Perylene-R6G excitation-dependant PLCT studies.

| $\lambda_{\text{ex}}$ (nm) | $I_{\text{ex, perylene}}$ | $I_{\text{ex, R6G}}$ | Measured CIE (x,y)           | Expected <sup>b</sup> CIE (x,y) | Absolute <sup>c</sup> Error |
|----------------------------|---------------------------|----------------------|------------------------------|---------------------------------|-----------------------------|
| 347                        | 64860                     | 186700               | 0.35, 0.47<br>(0.346, 0.471) | 0.36, 0.45<br>(0.356, 0.452)    | 0.02 (0.022)                |
| 349                        | 66970                     | 179400               | 0.34, 0.46<br>(0.342, 0.457) | 0.35, 0.45<br>(0.353, 0.445)    | 0.02 (0.016)                |
| 351                        | 74170                     | 160200               | 0.33, 0.44<br>(0.334, 0.436) | 0.34, 0.42<br>(0.340, 0.425)    | 0.01 (0.013)                |
| 353                        | 82370                     | 134400               | 0.32, 0.41<br>(0.320, 0.408) | 0.32, 0.40<br>(0.323, 0.396)    | 0.01 (0.013)                |
| 355                        | 90390                     | 112500               | 0.30, 0.37<br>(0.303, 0.375) | 0.30, 0.37<br>(0.305, 0.366)    | 0.01 (0.010)                |
| 357                        | 102400                    | 89870                | 0.28, 0.34<br>(0.281, 0.335) | 0.28, 0.32<br>(0.280, 0.325)    | 0.01 (0.011)                |
| 359                        | 111300                    | 74420                | 0.26, 0.29<br>(0.258, 0.294) | 0.26, 0.29<br>(0.260, 0.291)    | < 0.01 (0.004)              |
| 361                        | 129100                    | 59460                | 0.24, 0.25<br>(0.235, 0.254) | 0.24, 0.25<br>(0.237, 0.252)    | < 0.01 (0.003)              |
| 363                        | 158300                    | 51800                | 0.22, 0.22<br>(0.216, 0.220) | 0.22, 0.22<br>(0.217, 0.218)    | < 0.01 (0.002)              |
| 365                        | 181600                    | 44160                | 0.20, 0.20<br>(0.202, 0.196) | 0.20, 0.19<br>(0.202, 0.193)    | < 0.01 (0.003)              |
| 367                        | 197400                    | 38850                | 0.19, 0.18<br>(0.193, 0.180) | 0.19, 0.18<br>(0.193, 0.178)    | < 0.01 (0.002)              |

<sup>a</sup> Reported solution data was measured in chloroform at a tot. molecular conc. of  $1.2 \times 10^{-6}$  M. <sup>b</sup> Expected CIE (x,y) were calculated based on the measured properties of perylene ( $CIE_{\text{perylene}} = 0.14303, 0.09447$ ;  $I_{\text{ex,perylene}}$  reported in Table S6;  $\phi_{\text{perylene}} = 0.92$ ; and  $\chi_{\text{perylene}} = 0.5$ ) and R6G ( $CIE_{\text{R6G}} = 0.42455, 0.56565$ ;  $I_{\text{ex,R6G}}$  reported in Table S6;  $\phi_{\text{R6G}} = 1$ ; and  $\chi_{\text{R6G}} = 0.5$ ) using Eq. 1. <sup>c</sup> Absolute error was calculated based on the distance (d) between expected and measured CIE coordinates using  $d = \sqrt{(x_2 - x_1)^2 + (y_2 - y_1)^2}$ .

**Predicted CIE (x,y) sample calculation for  $\chi_{\text{perylene}}: \chi_{\text{R6G}} = 0.5:0.5$  @  $\lambda_{\text{ex}} = 347$  nm using Eq. S3 and Eq. S4:**

$$x_{\text{mix}} = \frac{0.92 \cdot 0.5 \cdot 64860}{0.92 \cdot 0.5 \cdot 64860 + 1 \cdot 0.5 \cdot 186700} \cdot 0.14303 + \frac{1 \cdot 0.5 \cdot 186700}{0.92 \cdot 0.5 \cdot 64860 + 1 \cdot 0.5 \cdot 186700} \cdot 0.42455 = 0.36$$

$$y_{\text{mix}} = \frac{0.92 \cdot 0.5 \cdot 64860}{0.92 \cdot 0.5 \cdot 64860 + 1 \cdot 0.5 \cdot 186700} \cdot 0.09447 + \frac{1 \cdot 0.5 \cdot 186700}{0.92 \cdot 0.5 \cdot 64860 + 1 \cdot 0.5 \cdot 186700} \cdot 0.56565 = 0.45$$

**Predicted CIE (x,y) sample calculation for  $\chi_{\text{perylene}}: \chi_{\text{R6G}} = 0.5:0.5$  @  $\lambda_{\text{ex}} = 367$  nm using Eq. S1 and Eq. S2:**

$$x_{\text{mix}} = \frac{0.92 \cdot 0.5 \cdot 197400}{0.92 \cdot 0.5 \cdot 197400 + 1 \cdot 0.5 \cdot 38850} \cdot 0.14303 + \frac{1 \cdot 0.5 \cdot 38850}{0.92 \cdot 0.5 \cdot 197400 + 1 \cdot 0.5 \cdot 38850} \cdot 0.42455 = 0.19$$

$$y_{\text{mix}} = \frac{0.92 \cdot 0.5 \cdot 197400}{0.92 \cdot 0.5 \cdot 197400 + 1 \cdot 0.5 \cdot 38850} \cdot 0.09447 + \frac{1 \cdot 0.5 \cdot 38850}{0.92 \cdot 0.5 \cdot 197400 + 1 \cdot 0.5 \cdot 38850} \cdot 0.56565 = 0.18$$

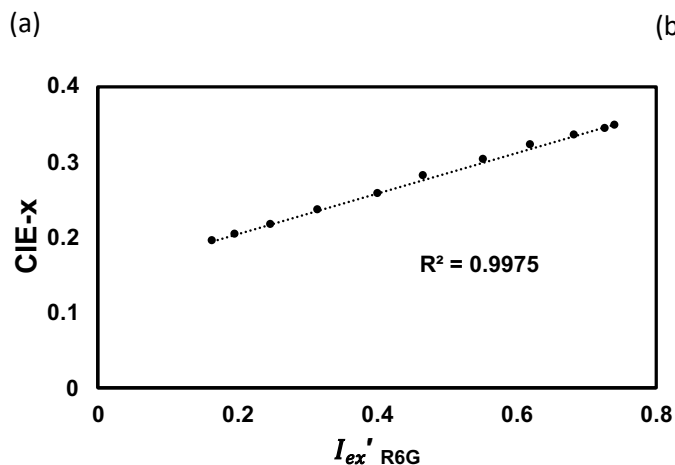

(b)

| $\lambda_{\text{ex}}$ (nm) | $I'_{\text{ex}}{}'_{\text{R6G}}$ | CIE-x   |
|----------------------------|----------------------------------|---------|
| 367                        | 0.164                            | 0.19335 |
| 365                        | 0.196                            | 0.20245 |
| 363                        | 0.247                            | 0.21582 |
| 361                        | 0.315                            | 0.23511 |
| 359                        | 0.401                            | 0.25754 |
| 357                        | 0.467                            | 0.28113 |
| 355                        | 0.554                            | 0.30269 |
| 353                        | 0.62                             | 0.32023 |
| 351                        | 0.684                            | 0.33371 |
| 349                        | 0.728                            | 0.34185 |
| 347                        | 0.742                            | 0.34619 |

**Figure S27.** a) Scatter plot showing the linear dependence ( $R^2 = 0.9975$ ) of CIE-x on the relative excitation intensity of R6G ( $I'_{\text{ex}}{}'_{\text{R6G}}$ ). Obtained from exciting a mixture of perylene-R6G with equivalent mole fractions between the range of 347 to 367 nm. b) Tabulated data showing the relative excitation intensity of R6G ( $I'_{\text{ex}}{}'_{\text{R6G}} = \frac{I_{\text{ex,R6G}}}{I_{\text{ex,perylene}} + I_{\text{ex,R6G}}}$ ) at various excitation wavelengths and the measured CIE-x coordinates.

## Perylene and Nile Red (NR) Mixing Experiment

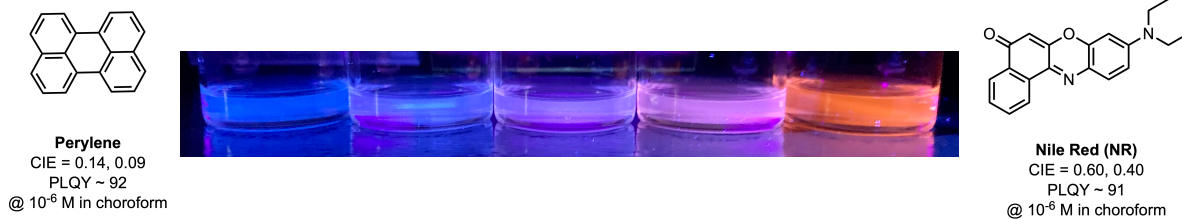

**Figure S28.** (From left to right) Perylene ( $1.2 \times 10^{-6}$  M), Perylene: NR ( $0.9 \times 10^{-6}$  M:  $0.3 \times 10^{-6}$  M), Perylene: NR ( $0.6 \times 10^{-6}$  M:  $0.6 \times 10^{-6}$  M), Perylene: NR ( $0.3 \times 10^{-6}$  M:  $0.9 \times 10^{-6}$  M), and NR ( $1.2 \times 10^{-6}$  M) irradiated with a long wave UV-lamp at 365 nm.

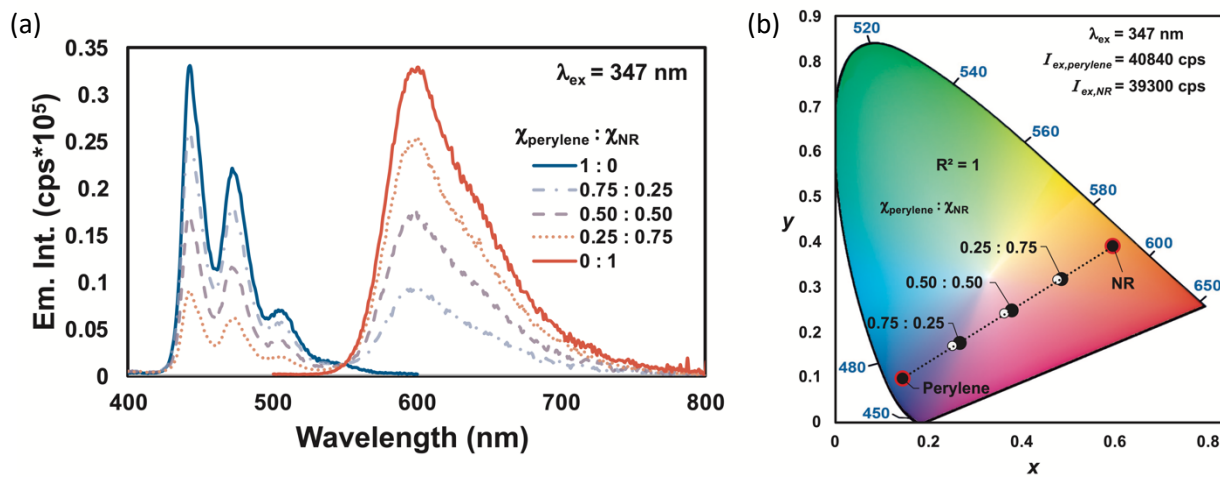

**Figure S29.** a) Perylene-NR emission scans ( $\lambda_{ex}$  347 nm) with differing mole fractions ( $\chi_{perylene} : \chi_{NR}$ ) and (b) the corresponding CIE diagram showing the measured (●) and predicted (○) CIE coordinates.  $R^2$  value (1) was obtained from measured data.

**Table S7.** Tabulated results obtained from Perylene-NR PLCT mixing studies ( $\lambda_{ex} = 347 \text{ nm}$ ).<sup>a</sup>

| Mole Fractions ( $\chi$ )<br>Perylene to NR | $\lambda_{ex} = 347 \text{ nm}$  |                                    |                                |
|---------------------------------------------|----------------------------------|------------------------------------|--------------------------------|
|                                             | Measured<br>CIE (x,y)            | Expected <sup>b</sup><br>CIE (x,y) | Absolute <sup>c</sup><br>Error |
| 1 to 0                                      | 0.14513, 0.09638                 | -                                  | -                              |
| 0.75 to 0.25                                | 0.27, 0.18<br>(0.26826, 0.17569) | 0.25, 0.17                         | 0.02 (0.016)                   |
| 0.50 to 0.50                                | 0.38, 0.25<br>(0.38069, 0.24836) | 0.37, 0.24                         | 0.02 (0.017)                   |
| 0.25 to 0.75                                | 0.49, 0.32<br>(0.48703, 0.31753) | 0.48, 0.31                         | < 0.01 (0.008)                 |
| 0 to 1                                      | 0.59787, 0.39000                 | -                                  | -                              |

<sup>a</sup> Reported solution data was measured in chloroform at a tot. molecular conc. of  $1.2 \times 10^{-6} \text{ M}$ . Total molecular concentration was held constant while the mole fractions ( $\chi$ ) each component was varied. <sup>b</sup> Expected CIE (x,y) were calculated based on the measured properties of perylene ( $CIE_{\text{perylene}} = 0.14513, 0.09638$ ;  $I_{ex,perylene} = 40840 \text{ cps}$  at  $\lambda_{ex} 347 \text{ nm}$ ;  $\phi_{\text{perylene}} = 0.92$ ; and  $\chi_i$  given in the table) and NR ( $CIE_{NR} = 0.59787, 0.39000$ ;  $I_{ex,NR} = 39300 \text{ cps}$  at  $\lambda_{ex} 347 \text{ nm}$ ;  $\phi_{NR} = 0.91$ ; and  $\chi_i$  given in the table) using Eq. 1. <sup>c</sup> Absolute error was calculated based on the distance ( $d$ ) between expected and measured CIE coordinates using  $d = \sqrt{(x_2 - x_1)^2 + (y_2 - y_1)^2}$ .

**Predicted CIE (x,y) sample calculation for  $\chi_{\text{perylene}} : \chi_{NR} = 0.5:0.5$  using Eq. S1 and Eq. S2:**

$$x_{mix} = \frac{0.92 \cdot 0.5 \cdot 40840}{0.92 \cdot 0.5 \cdot 40840 + 0.91 \cdot 0.5 \cdot 39300} \cdot 0.14513 + \frac{0.91 \cdot 0.5 \cdot 39300}{0.92 \cdot 0.5 \cdot 40840 + 0.91 \cdot 0.5 \cdot 39300} \cdot 0.59787 = 0.37$$

$$y_{mix} = \frac{0.92 \cdot 0.5 \cdot 40840}{0.92 \cdot 0.5 \cdot 40840 + 0.91 \cdot 0.5 \cdot 39300} \cdot 0.09638 + \frac{0.91 \cdot 0.5 \cdot 39300}{0.92 \cdot 0.5 \cdot 40840 + 0.91 \cdot 0.5 \cdot 39300} \cdot 0.39000 = 0.24$$

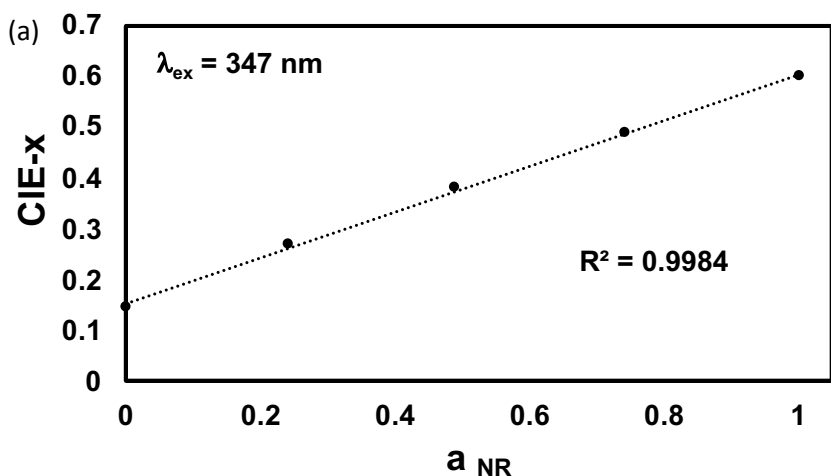

(b)

| $\chi_{NR}$ | $a_{NR}$ | Measured<br>CIE-x |
|-------------|----------|-------------------|
| 0           | 0        | 0.14513           |
| 0.25        | 0.241    | 0.26826           |
| 0.5         | 0.488    | 0.38069           |
| 0.75        | 0.741    | 0.48703           |
| 1           | 1        | 0.59787           |

**Figure S30.** a) Scatter plot showing the linear dependence ( $R^2 = 0.9984$ ) of the measured CIE-x on the *relative brightness* of NR ( $a_{NR} = \frac{\phi_{NR} \cdot I_{ex,NR} \cdot \chi_{NR}}{\sum \phi_i \cdot I_{ex,i} \cdot \chi_i}$ ) when excited at 347 nm and b) the corresponding tabulated data.

## Synthesis of Nile Red<sup>1</sup>

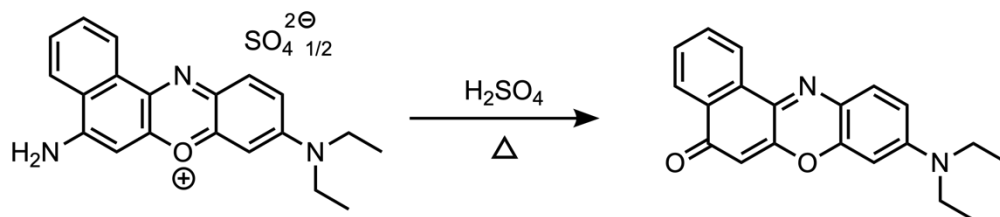

**Nile red:** Nile blue sulfate (2.006 g, 2.737 mmol) was added to a 250 mL two-neck flask fitted with a condenser and magnetic stir bar. The flask was charged with 0.5 M  $\text{H}_2\text{SO}_4$  (125 mL), stirring was initiated, and the temperature was ramped to achieve reflux. After 4 hr, the mixture was transferred to a separatory funnel, extracted with DCM (200 mL), and washed with  $\text{H}_2\text{O}$  (3 x 50 mL) and brine (1 x 50 mL). The organic phase was dried over  $\text{MgSO}_4$ , filtered, and dry-loaded onto celite for column chromatography (2:8 v/v EtOAc: Hexanes). A purple solid (0.248 g, 0.779 mmol; 14 % yield) was isolated ( $R_f = 0.54$ ; 4:6 v/v EtOAc: Hexanes).  $^1\text{H}$  NMR ( $\text{CDCl}_3$ , 400 MHz)  $\delta$  8.66 (dd, 1H), 8.31 (dd, 1H), 7.72 (m, 1H), 7.65 (m, 1H), 7.62 (d,  $J = 9.2$  Hz, 1H), 6.68 (dd,  $J = 9.2, 2.8$  Hz, 1H), 6.49 (d,  $J = 2.8$  Hz, 1H), 6.39 (s, 1H), 3.48 (q,  $J = 7.1$  Hz, 4H), 1.27 (t,  $J = 7.1$  Hz, 6H);  $^{13}\text{C}$  NMR ( $\text{CDCl}_3$ , 101 MHz)  $\delta$  183.9, 152.3, 150.9, 147.0, 140.2, 132.2, 131.9, 131.5, 131.3, 130.1, 125.9, 125.1, 123.9, 109.8, 105.9, 96.5, 45.2, 12.8. Both,  $^1\text{H}$  and  $^{13}\text{C}$  spectra were in agreement with previously reported literature spectra.<sup>2</sup>



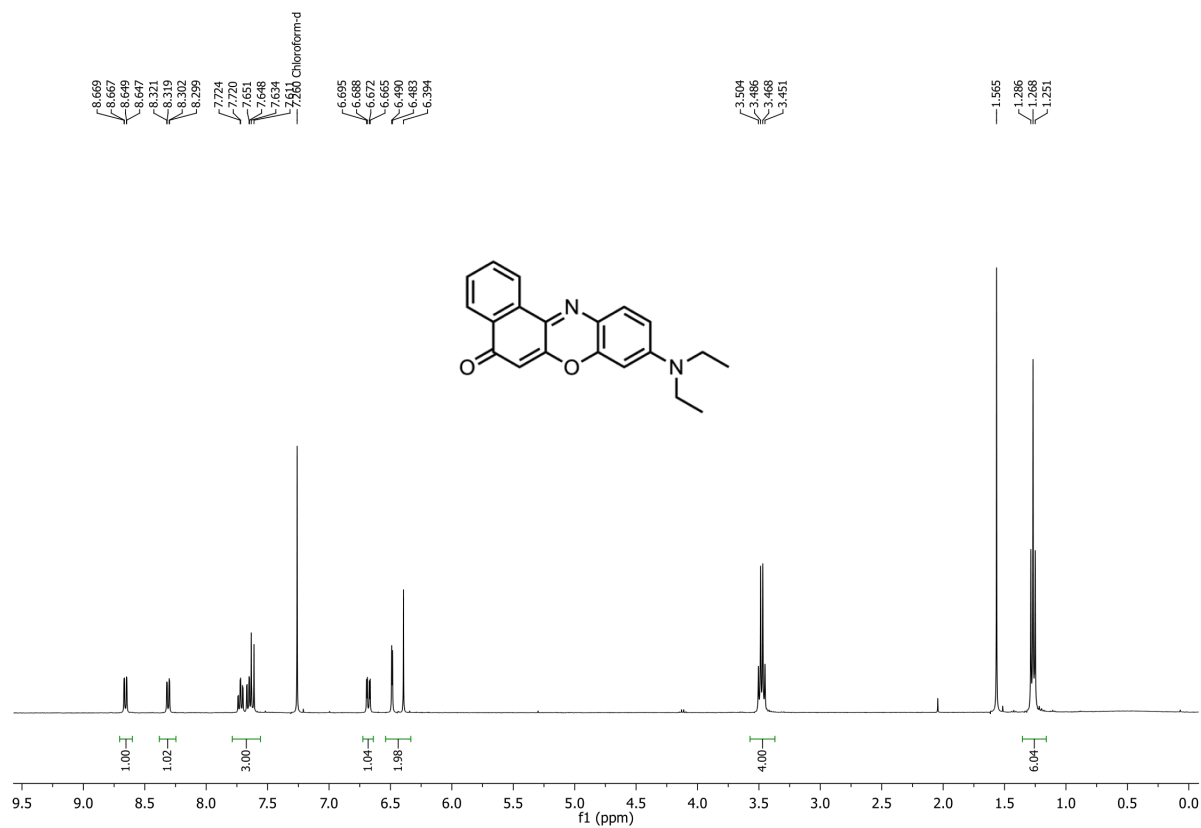

Figure S31. <sup>1</sup>H NMR (CDCl<sub>3</sub>, 400 MHz) spectrum of Nile Red.

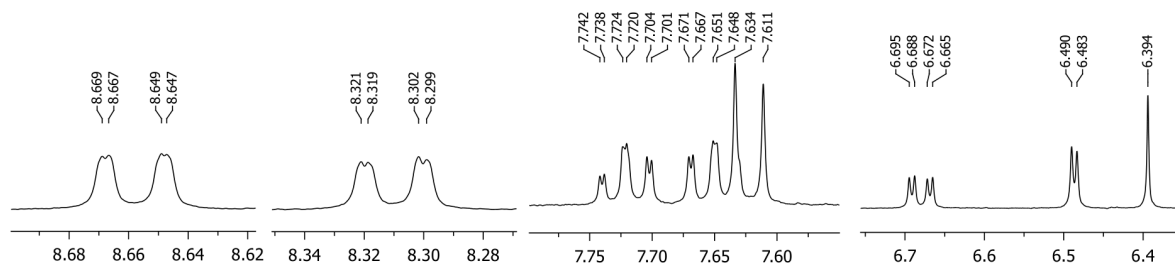

Figure S32. <sup>1</sup>H NMR (CDCl<sub>3</sub>, 400 MHz) spectrum of Nile Red.

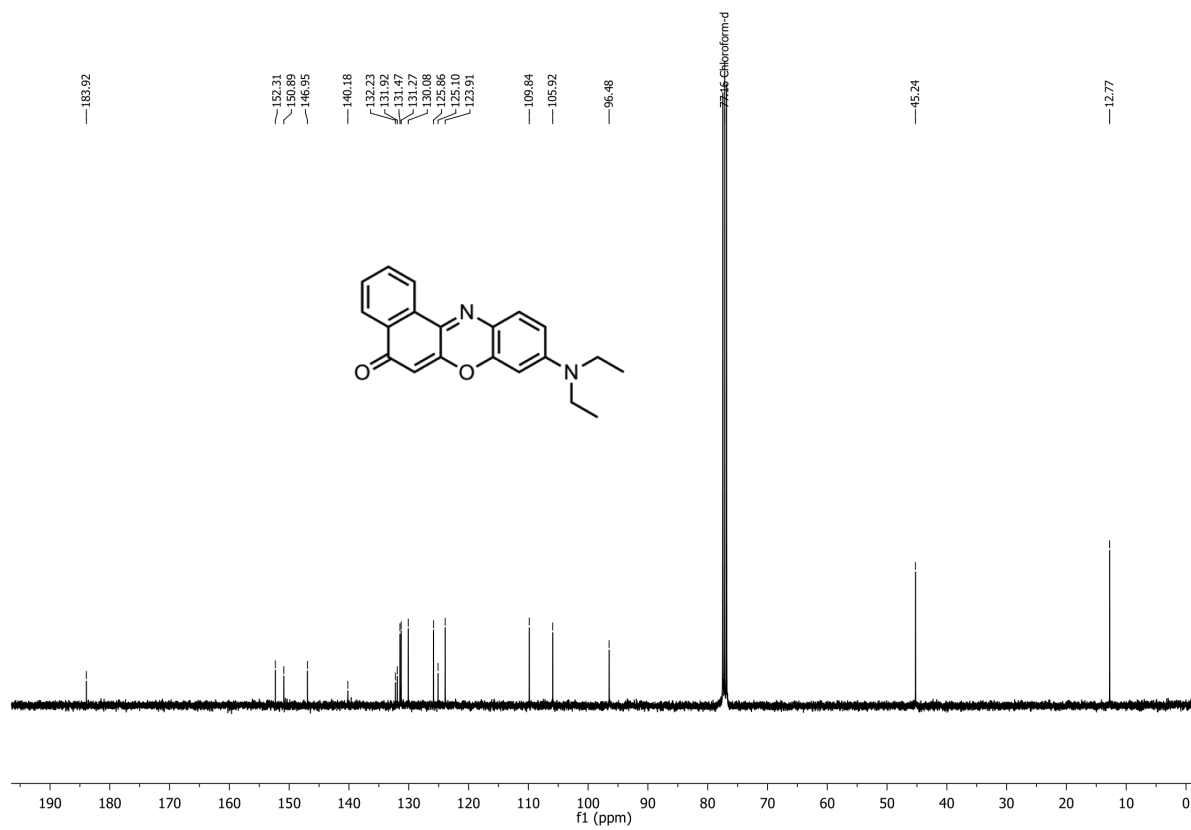

Figure S33.  $^{13}\text{C}$  NMR ( $\text{CDCl}_3$ , 101 MHz) spectrum of Nile Red.

### Three-component PLCT

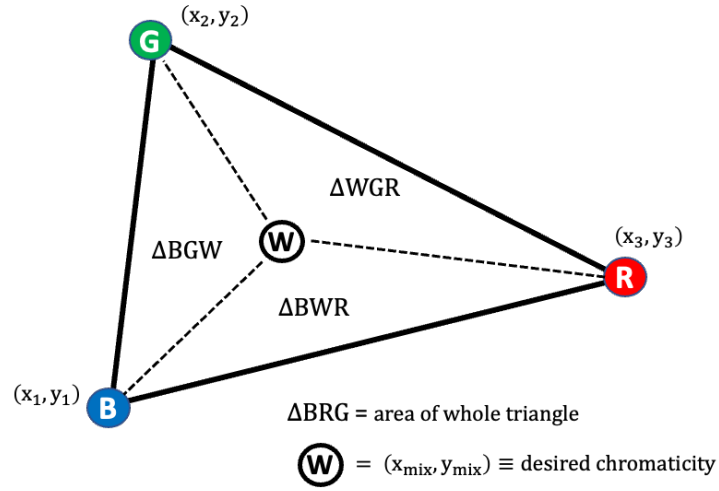

**Figure S34.** Representation of the *emission* color gamut available by mixing blue (B), green (G), and red (R) PL emitters.

$$W = a_1 B + a_2 G + a_3 R \quad (\text{Eq. S3})$$

$$(x_{\text{mix}}, y_{\text{mix}}) = a_1(x_1, y_1) + a_2(x_2, y_2) + a_3(x_3, y_3) \quad (\text{Eq. S4})$$

$$a_1 = \frac{\Delta WGR}{\Delta BRG} = \frac{\|\overline{WG} \times \overline{WR}\|}{\|\overline{BR} \times \overline{BG}\|} = \frac{(x_2 - x_{\text{mix}})(y_3 - y_{\text{mix}}) - (x_3 - x_{\text{mix}})(y_2 - y_{\text{mix}})}{(x_2 - x_1)(y_3 - y_1) - (x_3 - x_1)(y_2 - y_1)} \quad (\text{Eq. S5})$$

$$a_2 = \frac{\Delta BWR}{\Delta BRG} = \frac{\|\overline{BW} \times \overline{BR}\|}{\|\overline{BR} \times \overline{BG}\|} = \frac{(x_{\text{mix}} - x_1)(y_3 - y_1) - (x_3 - x_1)(y_{\text{mix}} - y_1)}{(x_2 - x_1)(y_3 - y_1) - (x_3 - x_1)(y_2 - y_1)} \quad (\text{Eq. S6})$$

$$a_3 = \frac{\Delta BGW}{\Delta BRG} = \frac{\|\overline{BG} \times \overline{BW}\|}{\|\overline{BR} \times \overline{BG}\|} = \frac{(x_2 - x_1)(y_{\text{mix}} - y_1) - (x_{\text{mix}} - x_1)(y_2 - y_1)}{(x_2 - x_1)(y_3 - y_1) - (x_3 - x_1)(y_2 - y_1)} \quad (\text{Eq. S7})$$

$$a_1 = c_B \cdot \phi_B \cdot I_{\text{ex},B} \quad (\text{Eq. S8})$$

$$a_2 = c_G \cdot \phi_G \cdot I_{\text{ex},G} \quad (\text{Eq. S9})$$

$$a_3 = c_R \cdot \phi_R \cdot I_{\text{ex},R} \quad (\text{Eq. S10})$$

**Determining the composition of emitters required to achieve WLE (0.33,0.33) using  $\lambda_{ex} = 274 \text{ nm}$**

1. Based on the CIE coordinates of perylene (0.14354, 0.09327), C6 (0.18737, 0.52564), and NR (0.60351, 0.39447), the *normalized* contributions of each emitter were calculated using Eq S5–S6, respectively.

$$a_{\text{perylene}} = 0.34$$

$$a_{C6} = 0.28$$

$$a_{NR} = 0.38$$

2. An arbitrary concentration of perylene was chosen ( $c_{\text{perylene}} = 4 \times 10^{-7} \text{ M}$ ) and  $a_{\text{perylene}}$  was calculated using Eq. S7.

$$a_{\text{perylene}} = \phi_{\text{perylene}} \cdot c_{\text{perylene}} \cdot I_{\text{ex,perylene}}$$

$$a_{\text{perylene}} = 0.92 \cdot (4 \times 10^{-7} \text{ M}) \cdot 99590 \text{ cps} = 0.03664912$$

3. Since  $a_{C6} = \frac{0.28}{0.34} a_{\text{perylene}}$ , Eq. S8 can be rewritten as:

$$a_{C6} = \frac{0.28}{0.34} (0.03664912) = \phi_{C6} \cdot c_{C6} \cdot I_{\text{ex,C6}}$$

4. Plugging in  $\phi_{C6} = 0.92$  and  $I_{\text{ex,C6}} = 130500 \text{ cps}$  into Eq. S8 and rearranging to solve for  $c_{C6}$ :

$$c_{C6} = \frac{\frac{0.28}{0.34} (0.03664912)}{0.92 \cdot 130500} = 2.51 \times 10^{-7} \text{ M}$$

5. Similarly, since  $a_{NR} = \frac{0.38}{0.34} a_{\text{perylene}}$ , Eq. S9 can be rewritten as:

$$a_{NR} = \frac{0.38}{0.34} (0.03664912) = \phi_{NR} \cdot c_{NR} \cdot I_{\text{ex,NR}}$$

6. Plugging in  $\phi_{NR} = 0.91$  and  $I_{\text{ex,NR}} = 137900 \text{ cps}$  into Eq. S9 and rearranging to solve for  $c_{NR}$ :

$$c_{NR} = \frac{\frac{0.38}{0.34} (0.03664912)}{0.91 \cdot 137900} = 3.26 \times 10^{-7} \text{ M}$$

7. Therefore, with an  $\lambda_{ex} = 274 \text{ nm}$ , the  $\chi_i$  of each component required to achieve WLE:

$$\chi_{\text{perylene}} = \frac{c_{\text{perylene}}}{\sum c_i} = 0.409 \approx 0.41$$

$$\chi_{C6} = \frac{c_{C6}}{\sum c_i} = 0.257 \approx 0.26$$

$$\chi_{NR} = \frac{c_{NR}}{\sum c_i} = 0.334 \approx 0.33$$

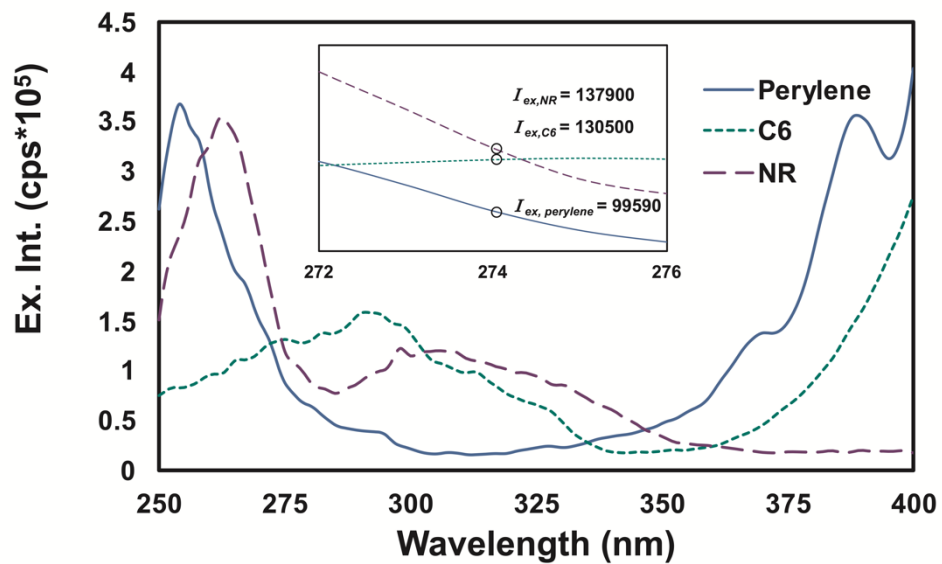

**Figure S35.** Overlaid excitation scans of perylene ( $\lambda_{em} = 443$  nm), C6 ( $\lambda_{em} = 491$  nm), and NR ( $\lambda_{em} = 597$ ) in chloroform ( $c = 1.2 \times 10^{-6}$  M). Excitation intensities at 274 nm for each emitter ( $I_{ex,perylene} = 99590$  cps,  $I_{ex,C6} = 130500$  cps,  $I_{ex,NR} = 137900$  cps) are highlighted in the inset.

## References

- (1) Li, P.; Dou, X.; Feng, C.; Müller, M.; Chang, M. W.; Frettlöh, M.; Schönherr, H. Isolated Reporter Bacteria in Supramolecular Hydrogel Microwell Arrays. *Langmuir* **2017**, *33* (31), 7799–7809. <https://doi.org/10.1021/acs.langmuir.7b00749>.
- (2) Hornum, M.; Mulberg, M. W.; Szomek, M.; Reinholdt, P.; Brewer, J. R.; Wüstner, D.; Kongsted, J.; Nielsen, P. Substituted 9-Diethylaminobenzo[a]Phenoxazin-5-Ones (Nile Red Analogues): Synthesis and Photophysical Properties. *J. Org. Chem.* **2021**, *86* (2), 1471–1488. <https://doi.org/10.1021/acs.joc.0c02346>.
